1 **Novel allosteric mechanism of p53 activation by small molecules for targeted anticancer**  
2 **therapy**

3 Joanna Zawacka-Pankau<sup>1,\*,&</sup>, Vera V. Grinkevich<sup>1</sup>, Mikhail Burmakin<sup>1</sup>, Aparna Vema<sup>2,#</sup>,  
4 Karin Fawcner<sup>1,10#</sup>, Natalia Issaeva<sup>3</sup>, Virginia Andreotti<sup>4</sup>, Eleanor R. Dickinson<sup>5</sup>, Elisabeth  
5 Hedström<sup>1</sup>, Clemens Spinnler<sup>1</sup>, Alberto Inga<sup>6</sup>, Lars-Gunnar Larsson<sup>1</sup>, Anders Karlén<sup>2</sup>, Olga  
6 Tarasova<sup>7</sup>, Vladimir Poroikov<sup>7</sup>, Sergey Lavrenov<sup>8</sup>, Maria Preobrazhenskaya<sup>8</sup>, Perdita E.  
7 Barran<sup>5</sup>, Andrei L. Okorokov<sup>9</sup>, and Galina Selivanova<sup>1,\*</sup>

8 <sup>1</sup>Department of Microbiology, Tumor and Cell Biology, Karolinska Institute, Solnavägen 9, Stockholm, SE 171  
9 65, Sweden

10 <sup>2</sup>Division of Organic Pharmaceutical Chemistry, Department of Medicinal Chemistry, Uppsala University, P.O.  
11 Box 574, BMC, S-751 23 Uppsala, Sweden

12 <sup>3</sup>Department of Otolaryngology, Yale Physicians Building, 800 Howard Ave, 4th Fl, New Haven, CT 06519

13 <sup>4</sup>Unit of Molecular Mutagenesis and DNA repair, National Institute for Cancer Research, IST, L.go R. Benzi X,  
14 16132 Genoa, Italy

15 <sup>5</sup>Manchester Institute of Biotechnology, The School of Chemistry, The University of Manchester, 131 Princess  
16 Street, Manchester, M1 7DN, UK

17 <sup>6</sup>Centre for Integrative Biology, CIBIO, University of Trento, via Sommarive 9, 38123, Trento, Italy

18 <sup>7</sup>Department for Bioinformatics, Institute of Biomedical Chemistry, 119121, Moscow, Russia

19 <sup>8</sup>Gause Institute of New Antibiotics, 119021, Moscow, Russia

20 <sup>9</sup>Wolfson Institute for Biomedical Research, University College London, Gower Street, London, WC1E 6BT,  
21 UK

22 <sup>10</sup>Present address: TLV, Box 225 20, 104 22, Stockholm

23 frame - the author has deceased during the project

24 \* shared senior authorship and correspondence:

25 Galina Selivanova, Galina.Selivanova@ki.se, +46852486302, fax: +46 8 342651

26 &lead contact: Joanna Zawacka-Pankau, joannazawackapankau1@gmail.com

27 # - these authors contributed equally to this study

28 **Running title:** Allosteric inhibition of p53/MDM2 and p53/MDMX

1 **Keywords:** p53; small molecules; allosteric inhibition; MDM2; MDMX; protoporphyrin IX;  
2 apoptosis; PASS, drug repurposing

3

#### 4 **Abstract**

5 Given the immense significance of p53 restoration for anti-cancer therapy, elucidation of the  
6 mechanisms of action of p53-activating molecules is of the utmost importance. Here we  
7 report a discovery of novel allosteric modulation of p53 by small molecules, which is an  
8 unexpected turn in the p53 story. We identified a structural element involved in p53  
9 regulation, whose targeting by RITA, PpIX and licofelone block the binding of p53  
10 inhibitors, MDM2 and MDMX. Deletion and mutation analysis followed by molecular  
11 modeling, identified the key p53 residues S33 and S37 targeted by RITA and PpIX. We  
12 propose that the binding of small molecules to the identified site induces a conformational  
13 trap preventing p53 from the interaction with MDM2 and MDMX. These results point to a  
14 high potential of allosteric activators. Our study provides the basis for the development of  
15 therapeutics with a novel mechanism of action, thus extending the p53 pharmacological  
16 potential.

17

#### 18 **Introduction**

19 Half of the human tumors express inactive mutant p53, while wild-type p53 is  
20 rendered functionally inert in cancer mainly due to the deregulated E3 ubiquitin ligase  
21 MDM2 and its homolog MDMX, which together potently inhibit p53 (Vousden et al. 2009).  
22 Several molecules targeting the p53-binding pocket of MDM2, such as nutlin and MI  
23 compounds, or the inhibitors of E3 ubiquitin ligase activity of MDM2, have been shown to  
24 induce p53-dependent growth suppression (Vassilev et al. 2004; Shangary et al. 2008; Yang  
25 et al., 2005) and some are currently tested in clinical trials (Hoe et al. 2014). However, MI

1 compounds and nutlins do not inhibit another p53 inhibitor – MDMX, which makes them less  
2 efficient in tumors overexpressing MDMX protein (Toledo et al. 2007).

3 We have identified a small molecule RITA in a cell-based screen for the p53  
4 reactivating compounds (Issaeva et al. 2004). RITA restores wild-type p53 in tumor cells by  
5 preventing p53/MDM2 interaction (Issaeva et al. 2004; Enge et al. 2009; Grinkevich et al.  
6 2009). Next, we have found that protoporphyrin IX (PpIX), a metabolite of aminolevulinic  
7 acid, a pro-drug applied in photodynamic therapy of cancer, activates p53 by inhibition of  
8 p53/MDM2 complex (Zawacka-Pankau et al. 2007). In contrast to nutlin, RITA does not  
9 target MDM2 but binds to the p53 N-terminus (Issaeva et al. 2004). However, how the  
10 binding to p53 affects p53/MDM2 complex remains unclear.

11 In the present study, we applied state-of-the-art molecular and cell biology  
12 approaches and molecular modeling to map the region within the p53 N-terminus targeted by  
13 small molecules and to address the mechanism of their action. We found that RITA targeted  
14 p53 outside of the MDM2-binding locus and identified the key structural elements in the  
15 RITA molecule along with contact residues in p53, which are critical for the interaction. We  
16 found that the binding of RITA promotes a compact conformation of partially unstructured  
17 N-terminus, which inhibits the interaction with MDM2 and MDMX. Further, another p53  
18 activator PpIX acts through a similar mechanism. Based on our results, we propose a model  
19 of a new allosteric mechanism of p53 activation. Using our model and chemoinformatic  
20 approaches, we have identified licofelone, a dual COX/LOX inhibitor, which blocks  
21 p53/MDM2 interaction via the mechanism that we uncovered.

22

## 23 **Results**

24 *RITA selectively interacts with p53 in cancer cells.*

1           Our previous findings indicate that RITA interacts with the N-terminal region of  
2 p53 *in vitro* (Issaeva et al. 2004). To test whether RITA targets p53 in a cellular context, we  
3 analyzed [<sup>14</sup>C]-RITA complexes with proteins formed in HCT 116 colon carcinoma cells  
4 carrying wild-type p53 and in their p53-null counterparts (HCT 116 *TPp53*<sup>-/-</sup>). To visualize  
5 the complexes, we electrophoretically separated them and detected the position of RITA and  
6 p53 by autoradiography and Western blot, respectively. Under mild denaturing conditions  
7 (snap boiling in the loading buffer), [<sup>14</sup>C]-RITA migrated with the electrophoretic front in the  
8 lysates of HCT 116 *TPp53*<sup>-/-</sup> (**Figure 1A**), whereas in the lysates of HCT 116 cells its  
9 migration was shifted, indicating the formation of complexes. The position of the major band  
10 coincided with that of p53. Further, the immunodepletion of p53 from the lysates (**Figure**  
11 **1A**) significantly decreased its intensity supporting the notion that it represents p53/RITA  
12 complex.

13  
14           Next, we developed a small-molecule band shift assay, analogous to the  
15 commonly used band shift assay for detection of protein/DNA binding. We separated [<sup>14</sup>C]-  
16 RITA/cellular proteins complexes by native electrophoresis and detected [<sup>14</sup>C]-RITA by  
17 autoradiography (**Figure 1B**). The major band of RITA/protein complex in HCT 116 cells  
18 treated with 5 μM coincided with that of p53 (**Figure 1B**). The absence of a similar band in  
19 the p53-null cells (at 5 μM RITA) (**Figure 1B**) indicates that it represents RITA bound to  
20 p53. We detected weaker RITA/protein complexes in HCT 116 p53<sup>-/-</sup>. We are not ruling out  
21 the possibility that RITA might interact with other proteins in cells lacking p53. One of the  
22 possible binding partners might be the p53 protein family member, p73 tumor suppressor  
23 since it bears high structural homology with the p53 N-terminus and is regulated by MDM2  
24 and MDMX proteins. Taken together, our data provide evidence for the selective interaction  
25 of RITA with p53 in cancer cells.

1

2 *RITA interacts with the N-terminus of p53.*

3           Next, we analyzed the interaction of RITA with the recombinant p53 N-  
4 terminus employing our small-molecule band shift assay. Upon incubation, <sup>14</sup>C-RITA formed  
5 a complex with Glutathione-S-transferase (GST)-fusion p53 N-terminus (Np53) (2-65), as  
6 manifested by the co-migration with Np53 (**Figure 1C**) but only weakly interacted with  
7 GST-tag (**Figure 2B**). In contrast, RITA did not associate with the human fibrinogen (**Figure**  
8 **1C**), suggesting a selective interaction with p53. Human serum albumin (HSA), a known  
9 carrier of various drugs in the blood (Koehler et al. 2002), was used as the binding control  
10 (**Figure 1C**). Under denaturing conditions [<sup>14</sup>C]-RITA/protein complexes were disrupted  
11 (**Figure 1D**), suggesting that this interaction is reversible.

12           Non-labeled RITA readily competed out the [<sup>14</sup>C]-RITA from the complex with  
13 Np53 at a low molecular excess, 1:1 or 1:2.5 (**Figure S1A**). However, it did not effectively  
14 compete with the [<sup>14</sup>C]-RITA/HSA complex (**Figure S1B**) suggesting a different mode of  
15 interaction.

16

17 *Mapping RITA binding site using deletion and point mutants*

18           To identify key p53 residues involved in the binding to RITA, we applied deletion  
19 mutagenesis approach to generate a series of p53 deletion mutants and assessed their  
20 interaction with RITA (**Figure 2A**).

21           Deletion of the first 25 residues containing the MDM2 binding site or mutations in  
22 residues 22/23 required for the interaction with MDM2 did not change the binding of p53 to  
23 RITA (**Figure 2B**). These results, as well as a weak, if any, interaction with Np53(2-25)  
24 protein (**Figure 2B**, upper panel) argue against the binding of RITA within the MDM2 site of  
25 p53.

1           Notably, Np53(38-58) GST fusion protein did not interact with RITA either  
2 (**Figure 2B**, lower panel). Together, our results indicate that RITA target sequence is located  
3 between residues 25-38 (**Figure 2A and B**). Further analysis revealed that Np53(35-65)  
4 interacted with RITA approximately 50% less efficiently than Np53(2-65) (**Figure 2B**).  
5 Therefore, we concluded that RITA targets residues located in the proximity to leucine 35.

6

#### 7 *Molecular modeling of RITA/p53 complex*

8           The X-ray crystallographic analysis of the p53-MDM2 complex structure shows  
9 that the N-terminal p53 region binds the MDM2 hydrophobic groove in the  $\alpha$ -helical form  
10 (Kussie et al., 1996) and the formation of this complex represents an important disordered-to-  
11 ordered transition (Lee et al., 2000). The N-terminal region of p53 is largely disordered and  
12 highly flexible and forms an amphipathic helical structure in the vicinity to MDM2 (Uversky,  
13 2016).

14           Thus, based on the limited, available information on the structural organization  
15 of the p53 N-terminus (Okorokov et al., 2006; Lowry et al., 2008; Espinoza-Fonesca, 2009)  
16 and our deletion mutagenesis, we performed Monte Carlo conformational search to explore  
17 the possible binding modes of RITA to the p53 N-terminus (MacroModel, 2008). The  
18 MCOMM-LMOD search on the RITA-p53 complex found 3492 low energy binding modes  
19 within 5 kcal/mol above the global minimum. Among these, the tenth lowest energy binding  
20 mode, 2.1 kcal/mol above the global minimum, appeared reasonable concerning the  
21 placement and orientation of RITA molecule.

22           This model implies that the binding of RITA involves the formation of hydrogen  
23 bonds between its terminal hydroxyl groups and serine 33 and serine 37 of p53, as well as  
24 hydrophobic interactions with proline 34 and 36 via one of its thiophene and the furan rings  
25 (**Figure 3A and B and Supplemental video 1**). Hydrogen bonds and hydrophobic

1 interactions between RITA and the p53 SPLPS amino acid sequence increase the already  
2 limited flexibility of this region (**Figure 3A and B**).

3 Molecular dynamics simulations suggest that leucine-rich hydrophobic clusters  
4 within residues 19-26 and 32-37 stabilize the folding and formation of  $\alpha$ -helices in the N-  
5 terminus (Espinoza-Fonesca et al. 2009). According to this study, MDM2-contacting residues  
6 F19, W23 and L26 within the  $\alpha$ -helix of p53 (residues 16-26) are facing inwards and are  
7 tacked inside, stabilized by the formation of hydrophobic leucine clusters, while more  
8 hydrophilic residues of the  $\alpha$ -helix are exposed to the solvent. This is supported by the  
9 tryptophan fluorescence assay, which demonstrated that W23 is shielded from the solvent  
10 (Kar et al., 2002). On the other hand, the X-ray structure of the MDM2-p53 peptide complex  
11 (1YCQ.pdb) shows that MDM2-contacting residues are facing out (**Figure 3C**). This  
12 indicates that the binding to MDM2 requires a partial unwinding of the  $\alpha$ -helix to flex out  
13 F19, W23, and L26, as illustrated in **Figure 3B and 3C**. Interestingly, a study by Lum and  
14 colleagues showed a slowed kinetics of loop closure in segments 13-23, 23-31, 31-53 and 53-  
15 60 of the p53 N-terminus induced by phosphorylation of S33, S46, and T81. This indicates  
16 that local electrostatic changes in p53 N-terminus induced by phosphorylation can be  
17 transmitted to remote sites through transient interaction networks in the disordered domain  
18 (Lum et al., 2012).

19 In line with this observation, our model indicates that RITA, by increasing the  
20 rigidity of the proline-containing SPLPS motif, induces a conformational trap in a remote  
21 MDM2 binding site. Next, we propose that constraints imposed by RITA prevent solvent  
22 exposure of F19, W23, and L26 residues, thus counteracting the p53/MDM2 interaction  
23 (**Figure 3B and 3C**).

24 Conformational change induced by RITA is expected to impinge on other protein  
25 interactions involving the p53 N-terminus. The binding of p53 to the MDM2 homolog,

1 MDMX requires the formation of an  $\alpha$ -helix as well as exposure of the same p53 residues, as  
2 facilitated by MDM2. We, therefore, reasoned that the conformational change induced by  
3 RITA might, also, abrogate the binding of MDMX as well.

4

5 *RITA inhibits p53/MDMX interaction in cells and in vitro.*

6 To assess whether RITA could inhibit p53/MDMX complex, we treated HCT  
7 116 colon cancer cells with RITA and performed co-immunoprecipitation. Our data indicated  
8 that RITA reduced the amount of MDMX bound to p53 by 43% (**Figure 3D**).

9 To further elucidate the ability of RITA to inhibit the p53/MDM2 and  
10 p53/MDMX interactions, we employed a yeast-based assay, which measures p53  
11 transcriptional functionality using as readout the activity of a p53-dependent luciferase  
12 reporter. Since MDM2 does not degrade p53 in yeast cells, the inhibitory effect of MDM2 in  
13 this system is ascribed to the direct interaction with p53 and consequent inhibition of p53-  
14 dependent transcription<sup>1</sup>. Co-transfection of MDM2 inhibited the transcription activity of  
15 p53 (**Figure 3E**), whereas RITA rescued wtp53-mediated transactivation of the reporter. In  
16 addition, RITA protected p53 from inhibition by MDMX (**Figure 3E**).

17 Taken together, our results demonstrated that the allosteric effects exerted by  
18 RITA result in the inhibition of both p53/MDM2 and p53/MDMX interactions.

19

20 *Terminal hydroxyl groups of RITA are crucial for RITA/p53 interaction*

21 Our model implies that the central furan ring of RITA is not relevant for the  
22 binding with p53. Indeed, an analog of RITA with the substitution of furan oxygen atom to  
23 sulfur (LCTA-2081, compound 2, see **ST1** for structure) had comparable p53-dependent  
24 activity in HCT 116 cells as assessed by the viability assay (**Figure 4A**). Further analysis of



1 RITA analogs (**ST1**) let us conclude that the presence of three rings is required for its p53-  
2 dependent biological activity.

3 Our molecular modeling predicts that one or two terminal hydroxyl groups are key  
4 for the interaction with p53. This prediction was supported by the loss of biological activity  
5 of RITA analog NSC-650973 (compound 4, **ST1**), lacking both hydroxyl groups (**Figure**  
6 **4A**). Further, this compound did not compete with [<sup>14</sup>C]-RITA for the binding to p53 *in vitro*  
7 (**Figure 4B**), when the samples of GST-dNp53 (20 μM) and [<sup>14</sup>C]-RITA (40 μM) were  
8 incubated with the increasing concentrations (40, 80 and 100 μM) of the inactive analog  
9 650973-N indicating that it does not interact with p53. Compound 4 contains additional  
10 methoxy group that adds up to the change of the structure when compared to RITA.  
11 However, further experiments highlight the crucial relevance of RITA hydroxyl groups and  
12 Np53 serine residues for RITA/Np53 complexes.

13 Next, we assessed the inhibition of p53/MDM2 interaction by RITA and  
14 compound 4 in cells using *in situ* proximity ligation assay (isPLA) (**Figure 4C**) (Söderberg et  
15 al., 2006; Castell et al., 2018). isPLA allows for detection of the interaction between the  
16 proteins using specific antibodies tagged to oligos. Briefly, the red fluorescence signals  
17 localized mostly in the nucleus indicate p53/MDM2 interactions. Treatment of MCF7 or  
18 U2OS cells with RITA significantly decreased the average number of p53/MDM2 isPLA  
19 nuclei signals (from 44 to 26.5 in MCF7 cells and from 58.32 to 25.52 in U2OS cells when  
20 compared with DMSO). Unlike RITA, compound 4 did not decrease the average number of  
21 isPLA nuclei signals, indicating that it does not inhibit p53/MDM2 interaction (**Figure 4D**,  
22 upper panel). In line with these data, compound 4 did not induce p53 accumulation (**Figure**  
23 **4D**, lower panel). Notably, compound 3, lacking one hydroxyl group (**ST1**, **Figure S2B**) was  
24 more efficient in suppressing the growth of HCT 116 cells than compound 4 (NSC-650973)  
25 but still less potent than RITA (**Figure 4A** and Issaeva et al., 2004). Thus, we conclude that

1 in agreement with our model, both terminal hydroxyl groups of RITA and three thiofuran  
2 rings are required for the efficient binding to p53. The ability to bind p53 correlates with the  
3 prevention of p53/MDM2 binding, induction of p53 and p53-dependent growth suppression.

4

5 *Serine 33 and serine 37 are critical for RITA/p53 interaction, p53 stabilization, and*  
6 *transcription activity*

7

8 To further validate our model, which predicted the crucial role of serines 33 and  
9 37 for RITA interaction, we mutated serine 33 (S33) to alanine, alone or in combination with  
10 serine 37 (S37), and assessed the binding of RITA to Np53(S33A) and Np53(S33A/S37A)  
(referred to as p53 (33/37) peptide) using band-shift assay.

11

12 In line with our model, the interaction of both mutant proteins with RITA was  
13 significantly decreased (**Figure 5A**), indicating the key role of these residues in binding to  
14 RITA. The difference in the intensity of the radioactive signal detected for the GST-tag is due  
15 to the usage of different phosphor screens and different batches of purified proteins. The  
16 variations in the signal intensities do not affect the general conclusion that RITA interacts  
strongly with wt Np53 and displays only background binding to GST-tag.

17

18 Comparing to human p53, mouse p53 lacks residues corresponding to serine 33  
19 and proline 34, a residue, which is responsible for the hydrophobic interaction with RITA  
20 furan ring. Thus, to further highlight the relevance of the SPLPS motif in the binding of  
21 RITA to Np53, we decided to test whether RITA can bind mouse Np53 (**Figure 5B**). We  
22 detected only a 0.3 and 0.5 increase above the GST-tag in the radioactive signal of RITA  
23 bound to mouse Np53(1-64) and Np53(1-85) respectively. The increase in the radioactive  
24 signal above the GST-tag for human Np53 was 1.9 (**Figure 5C**), suggesting that the presence  
25 of S33 and P34 residues is important for RITA binding to p53. Further, in line with other  
assays, Scintillation Proximity Assay (SPA), which detects the excitation of protein-coated

1 beads by radioactively labeled RITA only when in very close proximity (24), revealed that  
2 the binding of  $^{14}\text{C}$ -RITA to mouse p53 and Np(33/37) mutant is inefficient (**Figure 5D**).

3 In contrast to nutlin, which blocked the p53/MDM2 complex and induced p53  
4 accumulation in mouse cells, RITA did not disrupt the mouse p53/MDM2 interaction and did  
5 not induce p53 in mouse tumor cells and mouse embryonic fibroblasts (MEFs) expressing  
6 Ras and c-Myc oncogenes (**Figure 5E** and **5F**). Nutlin but not RITA activated p53 beta-gal  
7 reporter in T22 mouse fibroblasts (**Figure S3**). These data are consistent with our previous  
8 results demonstrating the absence of growth suppression by RITA in mouse tumor cell lines  
9 (Issaeva et al., 2004).

10 Notably, swapping mouse p53 to human p53 in mouse embryo fibroblasts (SWAP  
11 MEF) derived from transgenic mice expressing human p53 in mouse p53-null background  
12 (Dudgeon et al., 2006) restored the ability of RITA to induce p53. As shown in **Figure 5G**,  
13 RITA induced p53 in SWAP MEF's expressing c-Myc and Ras. It did not affect SWAP cells  
14 without Ras and Myc overexpression, which is in line with our previous data suggesting that  
15 oncogene activation, is required for RITA-mediated induction of p53 (Issaeva et al., 2004;  
16 Grinkevich et al., 2009). Taken together, these data suggest that S33 within SPLPS motif is  
17 required for RITA/p53 binding.

18 To further validate the role of Ser 33 and 37 we compared the ability of RITA  
19 to rescue wtp53 and S33A/S37A mutant (referred to as p53 (33/37) from MDM2 using yeast-  
20 based reporter assay. Both 10  $\mu\text{M}$  nutlin and 1  $\mu\text{M}$  RITA relieved p53-mediated  
21 transactivation from MDM2 inhibition (**Figure 6A**), whereas their effects on the activity of  
22 p53(33/37) were different. Nutlin protected both wt and p53(33/37) from inhibition by  
23 MDM2 equally well (*t*-student;  $p < 0.05$ ), but RITA had a significantly weaker effect on the  
24 p53(33/37) (**Figure 6A**). Due to short treatment, significant binding of  $^{14}\text{C}$ -RITA to p53  
25 protein in cells was detected for a higher dose of the compound at which p53 accumulates

1 rapidly in cancer cells. Potent inhibition of p53/MDM2 interactions at 1  $\mu$ M RITA in yeast-  
2 based assay correlates well with the inhibition of p53/MDM2 complex in cancer cells  
3 (Issaeva et al., 2002) and indicates that disruption of p53/MDM2 and p53/MDMX  
4 interactions are needed for p53 stabilization and accumulation in cancer cells. These data lend  
5 further support to the notion that S33 and S37 play an important role in RITA-mediated  
6 inhibition of p53/MDM2 interaction.

7           Next, we addressed the question whether the same serine residues are important  
8 for the induction of p53 in human cells by RITA. We stably expressed S33/S37 p53 and  
9 wtp53 in colon carcinoma RKO *TP53*<sup>-/-</sup> cancer cells, in which both alleles of wtp53 were  
10 inactivated by homologous recombination (Sur et al., 2009). Nutlin induced the accumulation  
11 of wt and p53(33/37) with similar efficiency (**Figure 6B** and not shown). In contrast, the  
12 induction of the double serine mutant by RITA was impaired (**Figure 6B** and not shown).

13           Importantly, CD spectroscopy confirmed our previously published data  
14 (Dickinson et al. 2015) that RITA increases the content of the secondary structure in Np53  
15 (**Figure 6C**, left panel). These data support our model that the binding of RITA induces a  
16 conformational change in p53 (**Figure 6C**, left panel). To elucidate the role of serine 33 and  
17 37 in a RITA-mediated increase of the secondary structure in Np53, we incubated  
18 Np53(33/37) with the excess of RITA (1:2 ratio) and performed CD analysis. As shown in  
19 **Figure 6C**, (right panel), RITA did not increase the secondary structure in Np53(33/37). In  
20 contrast, we observed the increase in the unstructured content after incubation with RITA.  
21 The change in Np53(33/37) upon RITA incubation remains to be elucidated.

22           Next, we applied ion mobility mass spectrometry (IM-MS) that allows studying  
23 the topology of proteins under various conditions (Jurneczko et al. 2013; Harvey et al. 2012).  
24 Briefly, we first incubated both wt and Np53(33/37) in the presence or absence of RITA.  
25 Proteins (50 $\mu$ M) were incubated with RITA in 1:2 ratio and analyzed by IM-MS

1 **(Supplemental Experimental procedures)**. The wtNp53 after incubation with RITA  
2 presents as ions of the form  $[M+zH]^{z+}$  where  $4 \leq z \leq 10$  with charge states  $5 \leq z \leq 8$  at a  
3 significant intensity (**Figure 6D**, upper panel). The mass spectra for Np53 without RITA,  
4 with RITA and the control spectra, show no mass shift, suggesting that RITA binding is lost  
5 during desolvation (**Figure S4A**). Nonetheless, the conformation of Np53 in the presence of  
6 RITA was changed. The collision cross-section distributions in **Figure 6D**, show that in the  
7 absence of RITA, Np53 presents in two distinct conformational families centered at  $\sim 1500$   
8 and  $\sim 1750 \text{ \AA}^2$ . Upon incubation with RITA the more extended conformer is lost, the  
9 conformer at  $\sim 1500 \text{ \AA}^2$  remains present at a lowered intensity and a third conformational  
10 family centered on  $\sim 1000 \text{ \AA}^2$  appeared, suggesting significant compaction of the protein.  
11 Control experiments confirmed that this conformer was present only after incubation with  
12 RITA (**Figure S4A**). This trend was observed for all sampled charge states (**Figure S5A**)  
13 with small variations in conformer intensity attributable to coulombic repulsion upon  
14 desolvation. Thus, RITA induces the generation of a unique compact conformer (or closely  
15 related conformational family) in wtNp53. This is in agreement with our previously  
16 published data showing that RITA promotes an allosteric change in p53 N terminus <sup>2</sup>. In  
17 contrast, Np53(33/37) showed no gross conformational change after incubation with RITA  
18 (**Figure 6D**, bottom panel, and **Figure S4B**, **S5B**). Np53(33/37) presents in two  
19 conformations centered at  $\sim 1100$  and  $1500 \text{ \AA}^2$  both in the absence and presence of RITA.

20 Taken together, these data provide compelling evidence that the allosteric  
21 activation of p53 by RITA requires residues S33 and S37.

22

### 23 *Identification of PpIX as another allosteric activator of p53*

24 Next, we decided to assess whether the identified allosteric mechanism of p53  
25 activation could be applied to other inhibitors of p53/MDM2 interaction. We have previously

1 shown that small molecule protoporphyrin IX (PpIX), a photosensitizer applied in clinics,  
2 binds to the p53 N-terminus and disrupts p53/MDM2 complex (Zawacka-Pankau et al., 2007,  
3 Sznarkowska et al., 2010). Here, we tested if PpIX targets the same amino acid residues in  
4 p53 as RITA, using fluorescent-based small-molecule band shift assay. Fluorescent band shift  
5 assay indicates that substitution of serine 33 to alanine or double mutation in serine 33 and  
6 serine 37 decreases the binding of PpIX to the p53 N-terminus (**Figure S6**).

7         Next, we used a new technology called a Fluorescent-2 Hybrid (F2H®) Assay  
8 developed to study protein-protein interactions in live cells (Zolghard et al., 2008). Briefly,  
9 we employed tethering of MDM2 protein (LacI-GFP-Mdm2) at protein-protein interaction  
10 platform in the nucleus of U2OS cells and detected the complex of MDM2 with p53 (RFP-  
11 p53) using fluorescent-based imaging (**Figure S7A**). We detected a potent inhibition of  
12 p53/MDM2 interaction in U2OS cells by PpIX ( $61 \pm 8\%$ ,  $p < 0.01$ ,  $n=6$ ), which was  
13 comparable to positive control, nutlin ( $60 \pm 5\%$ ,  $p < 0.001$ ,  $n=6$ ).

14         Using the yeast-based reporter assay, we confirmed that PpIX rescues p53  
15 transcriptional activity from both MDM2 and MDMX (**Figure S7B**).

16         Taken together, our findings implicate the conformational state of the SPLPS  
17 sequence distal from the MDM2-interacting residues as a key structural element regulating  
18 p53/MDM2 interaction as presented in the model in **Figure 6E**. This site could be modulated  
19 by small molecules such as RITA and PpIX.

#### 20 *Identification of licoferone as an allosteric activator of p53*

21         To identify new small molecules, which can prevent p53/MDM2 binding via the  
22 allosteric mechanism that we discovered, we performed an informational search using the  
23 Therapeutic Targets Database (TTD) ([http://bidd.nus.edu.sg/group/cjttd/TTD\\_HOME.asp](http://bidd.nus.edu.sg/group/cjttd/TTD_HOME.asp)).  
24 We used the TTD internal Drug Similarity Search engine to estimate the Tanimoto  
25 coefficient (TC) of similarity for two molecules *A* and *B* (as described in **Supplemental**

1 **Experimental procedures**). We identified several candidate compounds among which  
2 licofelone, a dual LOX/COX inhibitor, was the top compound with TC of 0.73 (**ST2**).

3 To select the candidate molecule for further studies, we next performed a  
4 function-related search of RITA and licofelone properties using computer program PASS,  
5 which predicts the biological activity spectra based on the structural formula of the  
6 compounds (Lagunin et al., 2010; Filimonov et al. 2014; 2018). The prediction analysis  
7 showed that 17 out 26 (65.4%) biological activities predicted for licofelone coincided with  
8 those predicted for RITA.

9 Thus, we selected licofelone for further validation in biological assays. We found  
10 that licofelone inhibited the growth of cancer cells (**Figure 7A and B**). The inhibition was  
11 p53-dependent. At higher doses, licofelone also suppressed the growth of HCT 116 p53-/-  
12 cells (**Figure 7B**). We speculate that the effect might be due to the activation of p53 protein  
13 family member, p73 protein. However, this yet needs to be unequivocally demonstrated.  
14 Next, licofelone efficiently competed for the binding to p53 in gel shift assay, indicating that  
15 it binds the p53 N-terminus (**Figure 7C**). In line with p53-dependent growth suppression,  
16 licofelone induced p53 accumulation and expression of p53 pro-apoptotic targets Puma and  
17 Noxa (**Figure 7D**). Pull down assay showed that licofelone disrupted p53/MDM2 interaction  
18 (**Figure 7E**), which supports its functional similarity to RITA.

19 To evaluate the role of the structural element which we found to be critical for the  
20 allosteric activation of p53, we tested if alanine substitutions of S33 and S37 will prevent the  
21 effect of licofelone, using isogenic human colon cancer cells expressing either wtp53 or  
22 p53(33/37). Licofelone blocked the interaction between p53 and MDM2 but did not affect  
23 the p53(33/37)/MDM2 complex as shown in the immunoprecipitation assay (**Figure 7F**),  
24 suggesting that residues 33 and 37 are important for licofelone-mediated effect. In line with

1 these data, treatment with licofelone induced wtp53, but not p53(33/37) accumulation in  
2 RKO cancer cells (**Figure 7G**).

3 Finally, we tested if licofelone can prevent p53/MDMX interaction. As evident  
4 from the pull-down assay (**Figure 7H**), RITA, licofelone and PpIX, but not nutlin, blocked  
5 the p53/MDMX interaction in HCT116 cells. This indicates that targeting the identified  
6 structural element in p53 leads to its activation via a simultaneous inhibition of MDM2 and  
7 MDMX binding.

8 In conclusion, the biological validation of licofelone, a known anti-inflammatory  
9 compound, confirmed our prediction that it acts on p53/MDM2 interaction via a newly  
10 discovered allosteric mechanism.

11

## 12 **Discussion**

13 Reconstitution of the p53 tumor suppressor leads to the preferential suppression of  
14 highly malignant lesions (Feldser et al., 2010 Junttila et al., 2010). These data provide strong  
15 support for the studies aimed at reactivation of p53 function. Several compounds targeting the  
16 p53/MDM2 interaction via steric hindrance are currently undergoing clinical trials (Hoe et  
17 al., 2014). The high attrition rate of new candidate drugs in clinical trials demands the  
18 identification of novel compounds with a distinct mode of action and elucidation of  
19 mechanisms regulating p53/MDM binding for the efficient implementation of p53-targeting  
20 treatments into clinical practice.

21 Small molecule RITA activates wild-type p53 and inhibits p53/MDM2 interaction,  
22 however, it is unique among known MDM2 inhibitors because it binds p53, but not MDM2  
23 (Issaeva et al., 2004). Even though RITA has been reported to display p53-independent  
24 effects through the induction of the DNA damage response (Wanzel et al., 2016), it is a  
25 valuable tool to explore the mechanism of wild-type p53 reactivation. Thus, here, we



1 addressed the question of how exactly the binding of RITA to p53 affects the p53/MDM2  
2 complex.

3 In this study we identified the site in the p53 N-terminus targeted by RITA and  
4 demonstrated that RITA increases the content of secondary structure in Np53, using CD  
5 spectroscopy and IM-MS. Modulation of protein conformation by a weak binding ligand has  
6 previously been shown by IM-MS (Harvey et al., 2012). Interestingly, IM-MS can detect the  
7 changes in p53 conformation induced by single point mutations in the p53 core domain  
8 (Jurneczko et al., 2013) analogous to the detection of the structural changes in Np53 induced  
9 by RITA as detected by IM-MS.

10 Molecular dynamic simulations suggest that residues 32-37, coinciding with RITA-  
11 binding site, might be involved in the stabilization of a conformational state in which  
12 MDM2-contacting residues F19, W23, and L26 of p53 are tacked inside the molecule  
13 (Espinoza-Fonesca, 2009). In line with this study, the tryptophan fluorescence assay  
14 demonstrated that W23 is shielded from the solvent (Kar et al., 2002). Since X-ray structure  
15 of the MDM2 in complex with short p53 peptide (1YCQ.pdb) suggests that residues F19,  
16 W23 and L26 should be facing out to bind MDM2 as shown in **Figure 3C** (Kussie et al.,  
17 1996), it follows that the binding of p53 to MDM2 requires conformational changes.  
18 Importantly, a recent study revealed that segments 23-31 and 31-53 of the p53 N-terminus are  
19 involved in long-range interactions and can affect p53's structural flexibility upon MDM2  
20 binding or phosphorylation of residues S33, S46 and T81. In particular, the authors identified  
21 nonrandom structural fluctuations at 31-53 segment, which are affected by MDM2 binding.  
22 Moreover, the phosphorylation of S33, S46, and T81 induce both local and remote structural  
23 changes, which are propagated to the MDM2 binding site in p53 (Lum et al., 2012; Huang et  
24 al., 2009). These data provide experimental evidence supporting our idea that restricting

1 conformational mobility of segment involving residues 33-37 might serve to prevent  
2 p53/MDM2 interaction.

3 **Figure 6E** illustrates our model demonstrating that p53 exists in a range of  
4 conformational states, which are present in cells in a dynamic equilibrium. Binding to MDM2  
5 induces F19, W23, and L26 to be exposed and to fit into the p53-binding cleft of MDM2,  
6 causing the equilibrium to shift in favour of this conformation. Interaction of RITA with  
7 SPLPS stabilizes the alternative conformation, in which MDM2-contacting residues are  
8 trapped inside. In this way, the binding of RITA to p53 shifts the balance towards the p53  
9 conformer with low affinity to MDM2.

10 Further, we found that PpIX, which we have shown to bind to p53 and to disrupt  
11 p53/MDM2 interaction, also requires serine 33 and 37 for its functioning as a p53 activator.

12 Allosteric mechanism of RITA and PpIX action is an unexpected turn in the  
13 development of inhibitors of p53/MDM2 interaction, which is mostly focused on steric  
14 hindrance mechanism (Hoe et al., 2014).

15 Intriguingly, RITA-contact residues S33/P34 are involved in the conformation change  
16 elicited by Pin1 prolyl-isomerase, an endogenous allosteric modulator for p53, leading to the  
17 dissociation of p53 from MDM2 (Mantovani et al., 2007). It is thus possible that the  
18 conformational change induced by RITA is similar to the one triggered by Pin1 in cells.  
19 Further support for this idea comes from the observations that both RITA and Pin1 cause the  
20 release of p53 from its inhibitor iASPP (Issaeva et al., 2004, Mantovani et al., 2007) and that  
21 Pin1 contributes to p53-mediated apoptosis induced by RITA (Sorrentino et al., 2013).

22 One could question that the interaction between RITA and p53 might be too weak to  
23 affect the affinity of p53 to MDM2. However, more recent MD simulation shows that  
24 hydrogen bonds between residues Phe19-Gln72 and Leu26-Val93 of p53 and MDM2  
25 respectively are unstable and that the total non-bonded interaction energy between p53 and

1 MDM2 is – 162 kcal/mol (Liu and Yan, 2017). This model highlights the importance of  
2 residue Trp23 in stabilizing the interaction between p53 and MDM2. Once Trp23 is shielded  
3 from the solution, as indicated by our model, it makes the interaction between p53 and  
4 MDM2 impossible.

5 Next, we found that the interaction of p53 with another inhibitor, MDMX, is  
6 hindered by an allosteric mechanism. Our study shows that RITA, PpIX, and licofelone inhibit  
7 both MDM2 and MDMX binding to p53. This is in line with our data that, in contrast to  
8 nutlin, RITA is highly efficient in killing cancer cells with high expression of MDMX  
9 (Spinnler et al., 2011).

10 Our allosteric model of p53/MDM2 interaction allowed us to identify a potent  
11 functional analog of RITA, licofelone, which acts similar to RITA.

12 Anti-inflammatory compound licofelone, a 5-LOX/COX inhibitor has fewer side  
13 effects than conventional drugs (Kulkarni et al., 2008). Licofelone has been shown to  
14 suppress the growth of cancer cells *in vitro* and *in vivo*, which is attributed to 5-LOX/COX  
15 inhibition (Mohammed et al., 2011; Tavolari et al., 2008). Using chemoinformatics, we  
16 predicted a new activity of licofelone, i.e., prevention of p53/MDM2 interaction. We  
17 confirmed this prediction, showing that licofelone inhibits p53/MDM2 binding and that  
18 residues S33/S37 are required for this effect of licofelone. Further, licofelone induced p53  
19 and its target genes and suppressed the growth of cancer cells in a p53-dependent manner.

20 Prediction of new applications for existing drugs using computational methods has  
21 provided fascinating insights into the previously unknown pharmacology of these drugs  
22 (Keiser et al., 2009; Murtazalietva et al. 2017). Drug repositioning is an accelerated route of  
23 drug discovery, due to the established clinical and pharmacokinetic data. Identification of  
24 licofelone as a new inhibitor of p53/MDM2 and MDMX interaction might in future initiate  
25 its application for cancer treatment.

1 Our data establish the allosteric mechanism of inhibition of p53/MDM2 and  
2 p53/MDMX interaction by small molecules as a viable strategy for drug discovery. Next, the  
3 identified structural elements may provide the basis for the generation of new allosteric  
4 activators of p53, which might be valuable additions to the targeted therapeutic  
5 pharmacopeia.

6

## 7 **Materials and methods**

### 8 *In situ proximity ligation assay (PLA)*

9 *In situ* PLA was performed according to the Duolink (Olink biosciences) protocol with  
10 modifications (see **Supplemental Experimental procedures** for details).

### 11 *Binding assays with [<sup>14</sup>C]-RITA*

12 For a small molecule-band shift assay purified proteins (20 μM) or 80 μg of total protein  
13 from cell lysates and [<sup>14</sup>C]-RITA (40 μM) were incubated in buffer B (50 mM Hepes, pH 7.0,  
14 150 mM NaCl, 35% glycerol) at 37°C 30 min and separated in standard TBE or gradient  
15 native gels. Gels were stained to visualize proteins and radioactivity was measured using  
16 Phosphoimager Amersham Biosciences.

17 SDS-PAGE separation of RITA/protein complexes was performed in 10% gel after brief  
18 heating at 90°C of lysates in loading buffer. Proteins were depleted from cell lysates using  
19 anti-p53 DO-1 or anti-actin antibody (AC-15, Sigma), immobilized on protein A-conjugated  
20 DynaBeads (Invitrogen).

21 Co-immunoprecipitation of p53/MDM2 or p53/MDMX was performed as described  
22 previously (Issaeva et al., 2004). MDM2 in precipitates from mouse tumor cells MCIM SS  
23 cells expressing wtp53 (Magnusson et al., 1998) was detected by the 4B2 antibody, a gift  
24 from Dr. S. Lain. MDMX antibody was from Bethyl laboratories.

25

## 1 ***Scintillation Proximity Assay***

2 SPA PVT Protein A beads (500µl/sample) were incubated for 2h with anti-GST antibodies  
3 (1:100). 0.1 µg/µl of studied protein in SPA buffer (GST, Np53, Np53(33/37)) was added to  
4 GST-coated SPA beads. 10 µl [<sup>14</sup>C]-RITA (52 µCi) diluted 4 times in SPA buffer were added  
5 to protein samples (1.3 µCi). Unlabelled RITA was used as a cold substrate. SPA buffer was  
6 added to the final volume of 100 µl. Complexes were incubated for 1h at 37°C and  
7 luminescence released by the [<sup>14</sup>C]-RITA-excited beads were measured in a standard  
8 microplate reader.

## 9 ***Circular dichroism spectroscopy (CD)***

10 Proteins 50 µM were incubated with RITA (reconstituted in 100% isopropyl alcohol, IPA) or  
11 with the same amount of IPA as a blank at a 1:2 molar ratio in 25 mM ammonium acetate at  
12 37°C for 20 min. This results in a final concentration of IPA in each case of 5%.

13 All CD spectra were acquired using a JASCO instrument. 0.1 cm Hellma® cuvettes were  
14 used and measurements were performed in the far-UV region 260 – 195 nm at 21°C. CD  
15 spectra were recorded with a 1 nm spectral bandwidth, 0.5 nm step size with scanning speed  
16 200 nm/min. The spectra were recorded 5 times, and the data are representative of at least  
17 three independent experiments.

## 18 ***Mass Spectrometry and Ion Mobility Mass Spectrometry (IM-MS)***

19 Mass spectrometry and IM-MS were made on an in-house modified quadrupole time-of-flight  
20 mass spectrometer (Waters, Manchester, UK) containing a copper coated drift cell of length  
21 5cm. The instrument, its operation and its use in previous studies on p53 have been described  
22 elsewhere (McCullough et al., 2008; Jurnecko et al., 2013). Np53 was prepared at a  
23 concentration 50 µM in 50 mM Ammonium Acetate. Protein was incubated with RITA at a  
24 1:2 molar ratio at 37°C for 30 minutes before analysis. 5% isopropyl alcohol was added to  
25 solubilize the ligand in aqueous solution, consistent with CD spectroscopy data. In all cases

1 three repeats were taken, each on different days (For details see **Supplemental**  
2 **Experimental procedures**).

### 3 ***Molecular Modelling***

4 Homology model of p53 was developed using the Rosetta server (Kim et al., 2004, 2005;  
5 Rohl et al., 2004; Chivian et al., 2006). Generated models were validated and fitted to the  
6 cryo-EM data (Okorokov et al., 2006). Domain fitting into the 3D map of p53 was performed  
7 automatically using UCSF Chimera package from the Resource for Biocomputing,  
8 Visualization, and Informatics at the University of California, San Francisco (supported by  
9 NIH P41 RR-01081), ([www.cgl.ucsf.edu/chimera/](http://www.cgl.ucsf.edu/chimera/)) and further refined by UROX  
10 (<http://mem.ibs.fr/UROX/>). (For details see **Supplemental Experimental procedures**).

### 11 ***Yeast-based reporter assay***

12 The yeast-based functional assay was conducted as previously described<sup>3</sup>. Briefly, the p53-  
13 dependent yeast reporter strain yLFM-PUMA containing the luciferase cDNA cloned at the  
14 *ADE2* locus and expressed under the control of PUMA promoter (Inga et al., 2002) was  
15 transfected with pTSG-p53 (Resnick and Inga 2003), pRB-MDM2 (generously provided by  
16 Dr. R. Brachmann, Univ. of California, Irvine, CA, USA), or pTSG-p53 S33/37 mutant and  
17 selected on double drop-out media for TRP1 and HIS3. Luciferase activity was measured  
18 16 hrs after the shift to galactose-containing media and the addition of 1  $\mu$ M RITA, PpIX or 10  
19  $\mu$ M nutlin (Alexis Biochemicals), or DMSO. Presented are average relative light units and  
20 the standard errors obtained from three independent experiments each containing five  
21 biological repeats.

22

### 23 **Supplemental information**

24 Supplemental information includes Supplemental Experimental Procedures, Supplemental  
25 References, four supplemental figures and two tables.

## 1 **Acknowledgments**

2 This work was supported by grants to G.S. from the Swedish Research Council, the Swedish  
3 Cancer Society, and Ragnar Söderberg Foundation. JZP would like to acknowledge the grant  
4 from Karolinska Institute, Stockholms Läns Laddsting, the Strategic Research Program in  
5 Cancer and Åke Wibergs Stiftelse. O.T. and V.P would like to acknowledge the Russian State  
6 Academies of Sciences Fundamental Research Program for 2013-2020. Special thanks are  
7 addressed to Prof. Sir David Lane for helpful discussions, suggestions and encouraging  
8 feedback. We thank Prof. Sonia Lain for providing ARN8 and T22 cells and helpful  
9 discussions. We would like to thank Dr. Margareta Wilhelm for providing a Ras, cMyc  
10 transformed mouse embryonic fibroblast and helpful discussions. The authors are grateful to  
11 Yari Ciribilli, Bartosz Ferens, Dr. Anna Kostecka and Dr. Alicja Sznarkowska for technical  
12 assistance and helpful discussions. We are greatly indebted to Protein Science Facility  
13 Karolinska Institutet for protein purification and to all our colleagues who shared with us  
14 their reagents and cell lines.

## 16 **Authors contribution**

17 Conceptualization: G.S., J.Z-P; A.L.O. Methodology and data analysis: G.S., J.Z-P, A.L.O,  
18 V.V.G., N.I., P.E.B., A.I., LG.L, A.K., V.P., M.P. Investigation: J.Z-P., V.V.G., M.B., A.V.,  
19 K.R., N.I., V.A., E.R.D., E.H., C.S., O.T., S.L.; Writing draft: J.Z-P., A.L.O, V.V.G, V.P.,  
20 A.I., LG.L., O.T., P.E.B, G.S.; Writing review and editing: J.Z-P.; Supervision: G.S. and J.Z-  
21 P.

## 23 **Declaration of interests**

24 The authors declare no conflict of interests.

25

1 **References**

2 Andreotti, V. p53 transactivation and the impact of mutations, cofactors and small molecules  
3 using a simplified yeast-based screening system. *PLoS One*. **6(6)**, e20643 (2011).

4  
5 Castell, A. et al. A selective high-affinity MYC-binding compound inhibits MYC: MAX  
6 interaction and MYC-dependent tumor cell proliferation. *Sci Rep*. **8(1)**, 10064 (2018).

7  
8 Chivian, D., Baker, D. Homology modeling using parametric alignment ensemble generation  
9 with consensus and energy-based model selection. *Nucleic Acids Res.*, **34**, e112 (2006).

10  
11 Dickinson, E. R. et al. The use of ion mobility mass spectrometry to probe modulation of the  
12 structure of p53 and of MDM2 by small molecule inhibitors. *Front Mol Biosci*, **2**, 39 (2015).

13  
14 Dudgeon, C. et al. Tumor susceptibility and apoptosis defect in a mouse strain expressing a  
15 human p53 transgene. *Cancer Res*. **15**:66(6), 2928-2936 (2006).

16  
17 Enge, M. et al. MDM2-dependent downregulation of p21 and hnRNP K provides a switch  
18 between apoptosis and growth arrest induced by pharmacologically activated p53. *Cancer*  
19 *Cell* **15(3)**, 171-183 (2009).

20  
21 Espinoza-Fonesca, L.M. Leucine-rich hydrophobic clusters promote folding of the N-  
22 terminus of the intrinsically disordered transactivation domain of p53. *FEBS Lett*. **583(3)**,  
23 556-560 (2009).

24



- 1 Feldser, D.M. et al. Stage-specific sensitivity to p53 restoration during lung cancer  
2 progression. *Nature*. **468(7323)**, 572-5 (2010).
- 3
- 4 Filimonov, D.A. et al. Prediction of the biological activity spectra of organic compounds  
5 using the PASS online web resource. *Chem. Heterocycl. Compd.* **50(3)**, 444-457 (2014).
- 6
- 7 Grinkevich, V., Issaeva, N., Hossain, S., Pramanik, A., Selivanova, G. Reply to 'NMR  
8 indicates that the small molecule RITA does not block p53-MDM2 binding in vitro'. *Nat*  
9 *Med.* **11**, 1136-1137 (2005).
- 10
- 11 Grinkevich, V. et al. Ablation of key oncogenic pathways by RITA-reactivated p53 is  
12 required for efficient apoptosis. *Cancer Cell.* **15(5)**, 441-453 (2009).
- 13
- 14 Harvey, S. R. et al. Small-Molecule Inhibition of c-MYC:MAX Leucine Zipper formation Is  
15 Revealed by Ion Mobility Mass Spectrometry. *J. Am. Chem. Soc.* **134**, 19384-19392 (2012).
- 16
- 17 Hoe, K. K., Verma, C. S, Lane, D. P. Drugging the p53 pathway: understanding the route to  
18 clinical efficacy. *Nat Rev Drug Discovery*, **13**, 217-236 (2014).
- 19
- 20 Huang, F. et al. Multiple conformations of full-length p53 detected with single-molecule  
21 fluorescence resonance energy transfer. *Proc Natl Acad Sci U S A.* **106**:49, 20758-20763  
22 (2009).
- 23

- 1 Inga, A., Storici, F., Darden, T.A., Resnick, M.A. Differential transactivation by the p53  
2 transcription factor is highly dependent on p53 level and promoter target sequence. *Mol Cell*  
3 *Biol.* **22(24)**, 8612-25 (2002).
- 4
- 5 Issaeva, N. et al. Small molecule RITA binds to p53, blocks p53-HDM-2 interaction and  
6 activates p53 function in tumors. *Nat. Med.* **10**, 1321–1328 (2004).
- 7
- 8 Junttila, M. R. et al. Selective activation of p53-mediated tumour suppression in high-grade  
9 tumours. *Nature.* **468(7323)**, 567-71 (2010).
- 10
- 11 Jurneckzko, E. et al. Probing the Conformational Diversity of Cancer-Associated Mutations in  
12 p53 with Ion-Mobility Mass Spectrometry. *Angew. Chem. Int. Ed.* **52**, 4370-4374 (2013).
- 13
- 14 Kar, S. et al. Effect of Phosphorylation on the Structure and Fold of Transactivation Domain  
15 of p53. *J. Biol. Chem.* **277**, 15579 – 15585 (2002).
- 16
- 17 Keiser, M. J. et al. Predicting new molecular targets for known drugs. *Nature.* **462(7270)**,  
18 175-81 (2009).
- 19
- 20 Kim, D. E., Chivian, D., Baker, D. Protein structure prediction and analysis using the Robetta  
21 server. *Nucleic Acids Res.* **32**, W526 - W531 (2004).
- 22
- 23 Kim, D. E., Chivian, D., Malmström, L., David Baker, D. Automated prediction of domain  
24 boundaries in CASP6 targets using GinzU and RosettaDOM. *Proteins: Struct. Funct., Bioinf.*  
25 **61**, 193-200 (2005).

1  
2 Koehler, M. F. et al. Albumin affinity tags increase peptide half-life in vivo. *Bioorg Med*  
3 *Chem Lett.* **12(20)**, 2883-2886 (2002).  
4  
5 Krajewski, M., Ozdowy, P., D'Silva, L., Rothweiler, U., Holak, T. A. NMR indicates that the  
6 small molecule RITA does not block p53-MDM2 binding in vitro. *Nat. Med.* **11(11)**, 1135-  
7 1136 (2005).  
8  
9 Kulkarni, S. K., Singh, V. P. Licofelone: the answer to unmet needs in osteoarthritis therapy?  
10 *Curr Rheumatol Rep.* **10(1)**, 43-8 (2008).  
11  
12 Kussie, P. H. et al. Structure of the MDM2 oncoprotein bound to the p53 tumor suppressor  
13 transactivation domain. *Science.* **274(5289)**, 948-953 (1996).  
14  
15 Lagunin, A., Filimonov, D. A., Poroikov, V. V. Multi-targeted natural products evaluation  
16 based on biological activity prediction with PASS. *Cur. Phar. Des.* **16(15)**, 1703-1717  
17 (2010).  
18  
19 Liu, S. X., Yan, S. W. Mechanism of competition between Nutlin 3 and p53 for binding with  
20 MDM2. *Chin. Phys. Let.* **34(11)**, 118701 (2017).  
21  
22 Lowry, D. F., Hausrath, A. C., Daughdrill, G. W. A robust approach for analyzing a  
23 heterogenous structural ensemble. *Proteins: Struct., Funct., Bioinf.* **73**, 918-928 (2008).  
24

- 1 Mohammed, A. et al. Chemoprevention of colon and small intestinal tumorigenesis in  
2 APC(Min/+) mice by licoferone, a novel dual 5-LOX/COX inhibitor: potential implications  
3 for human colon cancer prevention. *Cancer Prev Res (Phila)*. **4(12)**, 2015-26 (2011).  
4  
5 MacroModel, version 9.6; Schrödinger, LLC:New York, NY, (2008).  
6  
7 Magnusson, K. P., Satalino, R., Qian, W., Klein, G., Wiman, K. G. Is conversion of solid into  
8 more anoxic ascites tumors associated with p53 inactivation? *Oncogene* **17**, 2333-2337  
9 (1998).  
10  
11 Mantovani, F. et al. The prolyl isomerase Pin1 orchestrates p53 acetylation and dissociation  
12 from the apoptosis inhibitor iASPP. *Nat Struct Mol Biol*. **14**, 9212-9220 (2007).  
13  
14 McCullough, B. J. et al. Development of an Ion Mobility Quadrupole Time of Flight Mass  
15 Spectrometer. *Anal. Chem.* **80**, 6336-6344 (2008).  
16  
17 Murtazaliev, K. A., Druzhilovskiy, D. S., Goel, R. K., Sastry, G. N., Poroikov, V. V. How  
18 good are publicly available web services that predict bioactivity profiles for drug  
19 repurposing? *SAR QSAR in Environ Res.* **28(10)**, 843-862 (2017).  
20  
21 Okorokov, A.L., Sherman, M.B., Plisson, C., Grinkevich, V., Sigmundsson, K., Selivanova,  
22 G., Milner, J., Orlova, E.V. The structure of p53 tumour suppressor protein reveals the basis  
23 for its functional plasticity. *EMBO J.* **25(21)**, 5191-5200 (2006).

- 1 Resnick, M.A. & Inga, A. Functional mutants of the sequence-specific transcription factor  
2 p53 and implications for master genes of diversity. *Proc Natl Acad Sci U S A.* **100(17)**, 9934-  
3 9 (2003).
- 4
- 5 Rohl, C. A., Strauss, C. E. M., Chivian, D., Baker, D. Modeling structurally variable regions  
6 in homologous proteins with rosetta. *Proteins* **55**, 656-677 (2004).
- 7
- 8 Sorrentino, G. et al. The prolyl-isomerase Pin1 activates the mitochondrial death program of  
9 p53. *Cell Death Differ.* **20(2)**, 198-208 (2013).
- 10
- 11 Söderberg, O. et al. Direct observation of individual endogenous protein complexes in situ by  
12 proximity ligation. *Nat. Methods.* **3**, 995-1000 (2006).
- 13
- 14 Sur, S. et al. A panel of isogenic human cancer cells suggests a therapeutic approach for  
15 cancers with inactivated p53. *Proc Natl Acad Sci U S A.* **106(10)**, 3964-3996 (2009).
- 16
- 17 Shangary, S. et al. Reactivation of p53 by a specific MDM2 antagonist (MI-43) leads to p21-  
18 mediated cell cycle arrest and selective cell death in colon cancer. *Mol Cancer Ther.* **7**, 1533-  
19 1542 (2008).
- 20
- 21 Sznarkowska, A. et al. Targeting of p53 and its homolog p73 by protoporphyrin IX. *FEBS*  
22 *Lett.* **585(1)**, 255-260 (2011).
- 23

1 Tavolari, S. et al. Licofelone, a dual COX/5-LOX inhibitor, induces apoptosis in HCA-7  
2 colon cancer cells through the mitochondrial pathway independently from its ability to affect  
3 the arachidonic acid cascade. *Carcinogenesis* **29(2)**, 371-80 (2008).

4  
5 Toledo, F., Wahl, G. M. MDM2 and MDM4: p53 regulators as targets in anticancer therapy.  
6 *Int J Biochem Cell Biol.* **39**, 1476-1482 (2007).

7  
8 Vousden, K. H., Prives, C. Blinded by the Light: The Growing Complexity of p53. *Cell.*  
9 **137(3)**, 413-31 (2009).

10

11 Uversky, V. N. p53 Proteoforms and Intrinsic Disorder: An Illustration of the Protein  
12 Structure–Function Continuum Concept. *Int J Mol Sci.* **17(11)**, 1874 (2016).

13

14 Yang, Y. et al. Small molecule inhibitors of HDM2 ubiquitin ligase activity stabilize and  
15 activate p53 in cells. *Cancer Cell.* **7(6)**, 547-559 (2005).

16

17 Zawacka-Pankau, J. et al. Protoporphyrin IX interacts with wild-type p53 protein in vitro and  
18 induces cell death of human colon cancer cells in a p53-dependent and -independent manner.  
19 *J Biol Chem.* **282(4)**, 2466-2472 (2007).

20

21 Wanzel, M. et al. CRISPR-Cas9-based target validation for p53-reactivating model  
22 compounds. *Nat Chem Biol.* **12(1)**, 22-8 (2016).

23

24 **Figure legends**

25 **Figure 1. RITA binds p53 in cells and *in vitro*.**

- 1 **A.** [ $^{14}\text{C}$ ]-RITA/protein complexes were detected in lysates of HCT 116 or HCT 116 *TP53*-/  
2 cells treated with 5  $\mu\text{M}$  [ $^{14}\text{C}$ ]-RITA for 12h upon separation in 10% SDS-PAGE under  
3 mild denaturing conditions. The position of RITA in the gel was visualized by  
4 autoradiography. p53 was detected by immunoblotting with the DO-1 antibody (right  
5 panel). Shown is a representative data of three independent experiments.
- 6 **B.** A small-molecule band shift assay was used to detect [ $^{14}\text{C}$ ]-RITA/protein complexes in  
7 lysates of HCT116 or HCT116*TP53*<sup>-/-</sup> cells treated with [ $^{14}\text{C}$ ]-RITA, and separated in  
8 gradient polyacrylamide gel under native conditions. [ $^{14}\text{C}$ ]-RITA and p53 were detected  
9 as in **A**.
- 10 **C.** [ $^{14}\text{C}$ ]-RITA interaction with recombinant proteins, GST-Np53(2-65), fibrinogen and  
11 human serum albumin (HSA) was detected by band shift assay using 2:1 molar excess of  
12 RITA. The dotted line indicates where the gel was cut.
- 13 **D.** Upon standard SDS electrophoresis [ $^{14}\text{C}$ ]-RITA/protein complexes were disrupted (n=3).  
14

15 **Figure 2. Mapping of RITA binding site within the p53 N-terminus.**

- 16 **A.** Scheme depicting the series of deletion mutants of GST-Np53 used in this study.
- 17 **B.** The binding of [ $^{14}\text{C}$ ]-RITA to p53 N terminus deletion mutants was analyzed in band  
18 shift assay as in **Figure 1C**. Band density was measured using ImageJ software and  
19 normalized to GST-tag signal. This is a representative data of three independent runs.  
20

21 **Figure 3. Molecular model of the p53/RITA complex and inhibition of the p53/MDMX**  
22 **interaction by RITA.**

- 23 **A.** Binding of RITA to SPLPS sequence (cyan) of p53 involves interaction with S33 and S37  
24 via terminal hydroxyl groups of RITA and hydrophobic interactions with P34 and P36.  
25 Hydrogen bonds are highlighted in black dotted lines. The orientation of MDM2-binding

1 helix of p53 (*lime*) is different upon p53 binding to RITA (blue) **B.** and MDM2 (*purple*)  
2 (pdb: 1YCQ) (**c**). Side chains of residues (F19, W23, and L26) involved in MDM2 binding  
3 are shown in (**B.**, **C.**). Atom type coloring; oxygen (*red*), nitrogens (*blue*), and sulfurs  
4 (*yellow*). See also **Movie S1**.

5 **D.** In line with the model prediction, RITA-mediated p53 conformational change results in  
6 the inhibition of p53/MDMX binding in HCT 116 cells as assessed by co-  
7 immunoprecipitation. This is representative data of three independent experiments. The  
8 dotted line indicates the site where the membrane was cut.

9 **E.** RITA rescues the p53 transcriptional activity from inhibition by MDM2 or MDMX as  
10 assessed in a yeast-based functional assay. The average light units relative to the  
11 transactivation activity of p53 alone and the standard errors of at least five biological  
12 repeats are presented. The *t*-student test was performed for statistical analysis with  $p \leq$   
13 0.05.

14

15 **Figure 4. Two terminal hydroxyl groups of RITA are crucial for the binding to p53 and**  
16 **disruption of p53/MDM2 interaction.**

17 **A.** RITA analog NSC-650973 (compound 4) lacking two hydroxyl groups did not suppress  
18 the growth of HCT 116 cancer cells, unlike LCTA-2081 (compound 2) analog with  
19 substituted O atom in furan ring (for structure refer to **Supplementary Table 1**), which  
20 retained full biological activity. NSC-672170 (compound 3) analog with one hydroxyl  
21 group substituted to ketone retained more than 60% of RITA biological activity.

22 **B.** Biologically inactive RITA analog compound 4 (40, 80 and 100  $\mu$ M) did not compete for  
23 the binding to GST-Np53 with [ $^{14}$ C] -RITA.

24 **C.** Visualization of p53/MDM2 complexes in MCF7 and U2OS cells treated or non-treated  
25 with RITA for 6 hrs using *in situ* Proximity Ligation Assay (isPLA) (red fluorescent



1 dots). The p53-null H1299 and U2OS cells stained without secondary antibody were  
2 used as the assay controls.

3 **D.** isPLA demonstrated the decrease in the average number of nuclear signals upon  
4 treatment with RITA, but not with its derivative NSC-650973 (upper panel). The  
5 normality was assessed with Shapiro-Wilk's test.  $p < 0.05$  values were considered  
6 statistically significant. RITA, but not compound 4 induced p53 accumulation in  
7 HCT116 cells, as detected by immunoblotting (lower panel).

8

9 **Figure 5. Serine 33 and serine 37 are crucial for the efficient binding of RITA to the p53**  
10 **N-terminus.**

11 **A.** Assessment of [ $^{14}\text{C}$ ]-RITA interaction with Np53 proteins carrying alanine substitutions  
12 of S33 or S33/S37 using band shift assay as in **Figure 1C**. Bands' density was quantified  
13 using ImageJ software and normalized to GST-tag.

14 **B.** Alignment of mouse and human p53 N-termini, highlighting the site for MDM2  
15 interaction and RITA-binding motif.

16 **C. D.** Inefficient binding of RITA to GST-fusion mouse p53 proteins, spanning residues 1-  
17 64 and 1-85 as detected by band shift assay and scintillation proximity assay (SPA). SPA  
18 assay reveals inefficient binding of RITA to Np53(33/37). Bands' density was quantified  
19 using ImageJ software and normalized to GST-tag (**C**).

20 **E.** Co-immunoprecipitation experiment demonstrated that RITA did not prevent MDM2/p53  
21 interaction in TA3-Sth mouse cancer cells, unlike nutlin. C - control untreated sample, R  
22 - RITA-treated and N - nutlin-treated samples; the dotted line represents different  
23 exposure time of this part of the membrane.

24 **F.** Mouse p53 in Myc- and Ras-transformed MEF's was not induced by RITA (R) in  
25 contrast to nutlin (N).

1 **G.** RITA efficiently induced the level of human p53 in SWAP MEF's transfected with Ras  
2 and c-Myc as detected by immunoblot.

3

4 **Figure 6. Serine 33 and serine 37 are required for RITA-mediated rescue of p53 from**  
5 **MDM2-dependent inhibition.**

6 **A.** The effect of the co-expression of MDM2 along with wt or 33/37 p53 upon the treatment  
7 with 1  $\mu$ M RITA (R) or 10  $\mu$ M nutlin (N) on a yeast-based luciferase reporter was  
8 assayed. The average light units relative to the transactivation activity of p53 alone and  
9 the standard errors of at least five biological repeats are presented. The *t*-student test was  
10 performed for statistical analysis with  $p < 0.05$ .

11 **B.** Induction of the p53 protein levels by 1  $\mu$ M RITA (R) and 10  $\mu$ M nutlin (N) in RKO  
12 colon cancer cells and their p53-null derivatives with reconstituted wt p53 and  
13 p53(33/37) as assessed by Western blotting. Band density was assessed using ImageJ  
14 software and normalized to non-treated controls.

15 **C.** RITA promotes an increase in the secondary structure in wt Np53 (left) but not in  
16 Np53(33/37) (right) as detected by circular dichroism spectroscopy (CD).

17 **D.** nESI mass spectra (left) and drift tube ion mobility mass spectrometry collision cross  
18 section distributions arising from arrival time distributions (right) for the  $[M+6H]^{6+}$   
19 analyte of wt Np53 in the absence and presence of RITA (top panel, adapted from <sup>2</sup> and  
20 Np53(33/37) in the absence and presence of RITA (bottom panel). Coloured Gaussian  
21 curves depict conformational families. wtNp53 undergoes a compaction event resulting  
22 in the induction of a novel conformational family shown in red. Np53(33/37)  
23 conformational spread is unaffected by RITA induction.

1 **E.** A scheme is illustrating the allosteric mechanism of RITA-mediated prevention of  
2 p53/MDM2 interaction. Binding of RITA shifts the balance towards p53 conformation  
3 with low affinity to MDM2.

4

5 **Figure 7. Licofelone activates p53 and disrupts p53/MDM2 and p53/MDMX**  
6 **interactions via targeting serine 33 and 37 residues.**

7 **A.** Dose-dependent inhibition of proliferation by licofelone (25, 50, 75 and 150  $\mu$ M) in  
8 MCF7 cells as examined in WST assay.

9 **B.** Licofelone (25, 50, 75 and 150  $\mu$ M) inhibited the growth of human colon cancer cells in  
10 a p53-dependent manner.

11 **C.** Licofelone competed for the binding to Np53 with  $^{14}$ C-RITA in small molecule band-  
12 shift assay. Bands' density was measured using ImageJ and normalized to Np53  
13 incubated with  $^{14}$ C-RITA alone.

14 **D.** Licofelone induced p53 and its targets PUMA and Noxa in HCT 116 and MCF7.

15 **E.** p53/MDM2 complex disruption in HCT 116 cells by licofelone as assessed in a co-  
16 immunoprecipitation assay.

17 **F.** Induction of the p53 protein by licofelone in p53-null RKO colon cancer cells with re-  
18 introduced wt p53, but not in cells expressing p53(33/37) as assessed by Western  
19 blotting.

20 **G.** Licofelone disrupted the interaction between MDM2 and wtp53 but not p53(33/37)  
21 mutant p53 in RKO cells as examined by co-immunoprecipitation.

22 **H.** RITA, PpIX, and licofelone, but not nutlin, disrupted p53/MDMX interaction in HCT  
23 116 cells assessed as in **G**.

24

A.

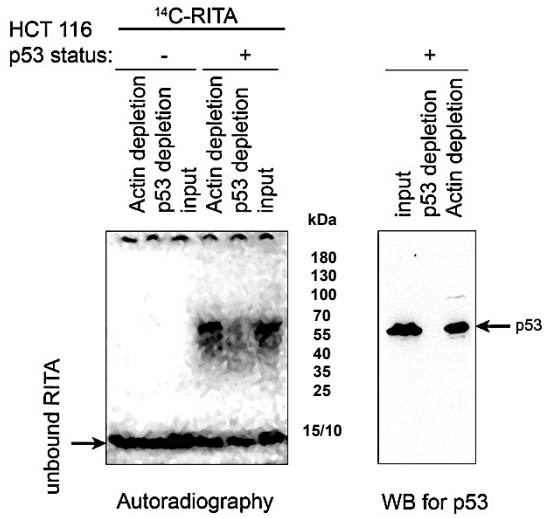

B.

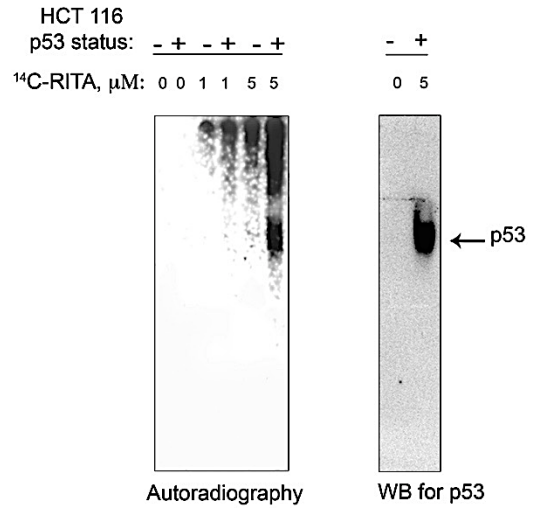

C.

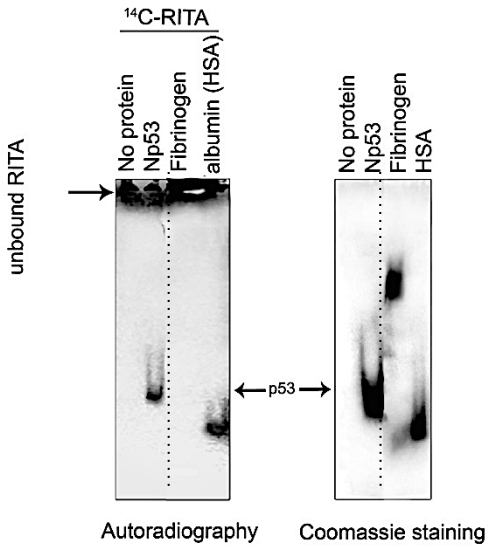

D.

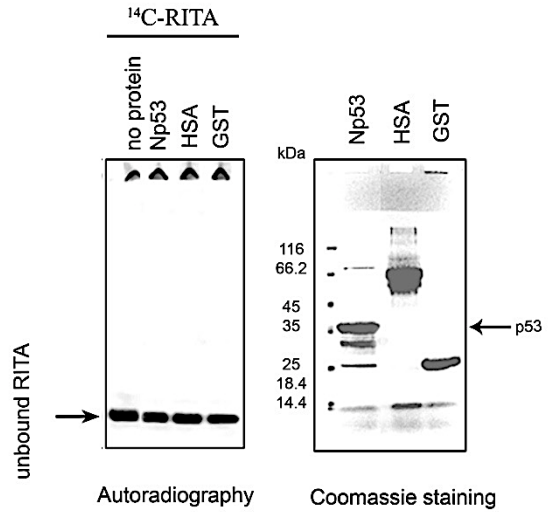

A.

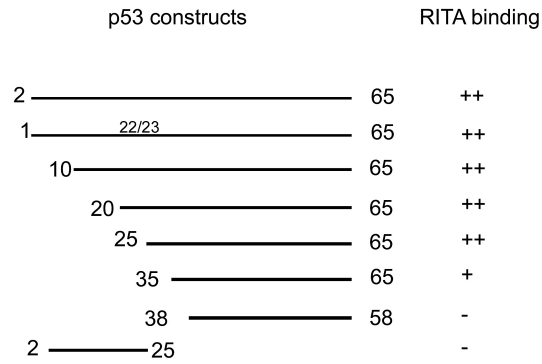

B.

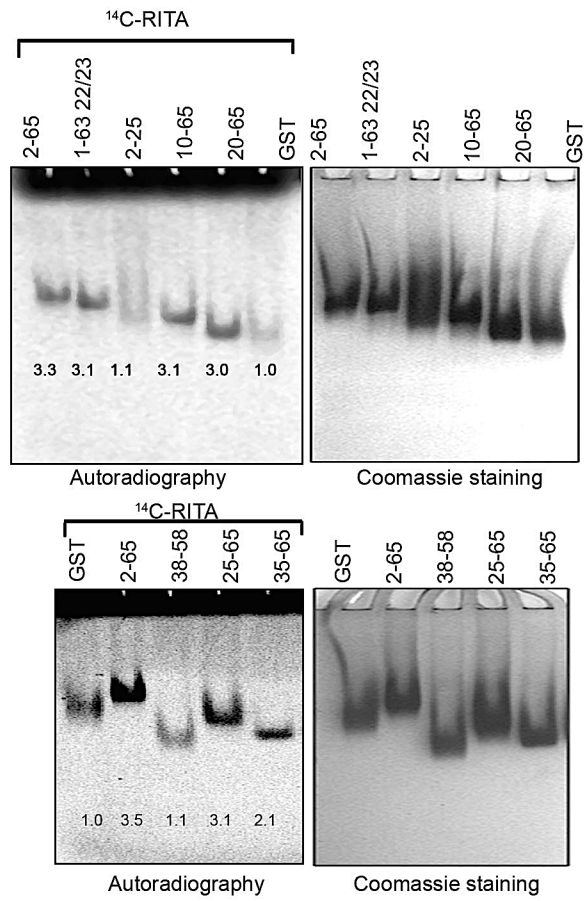

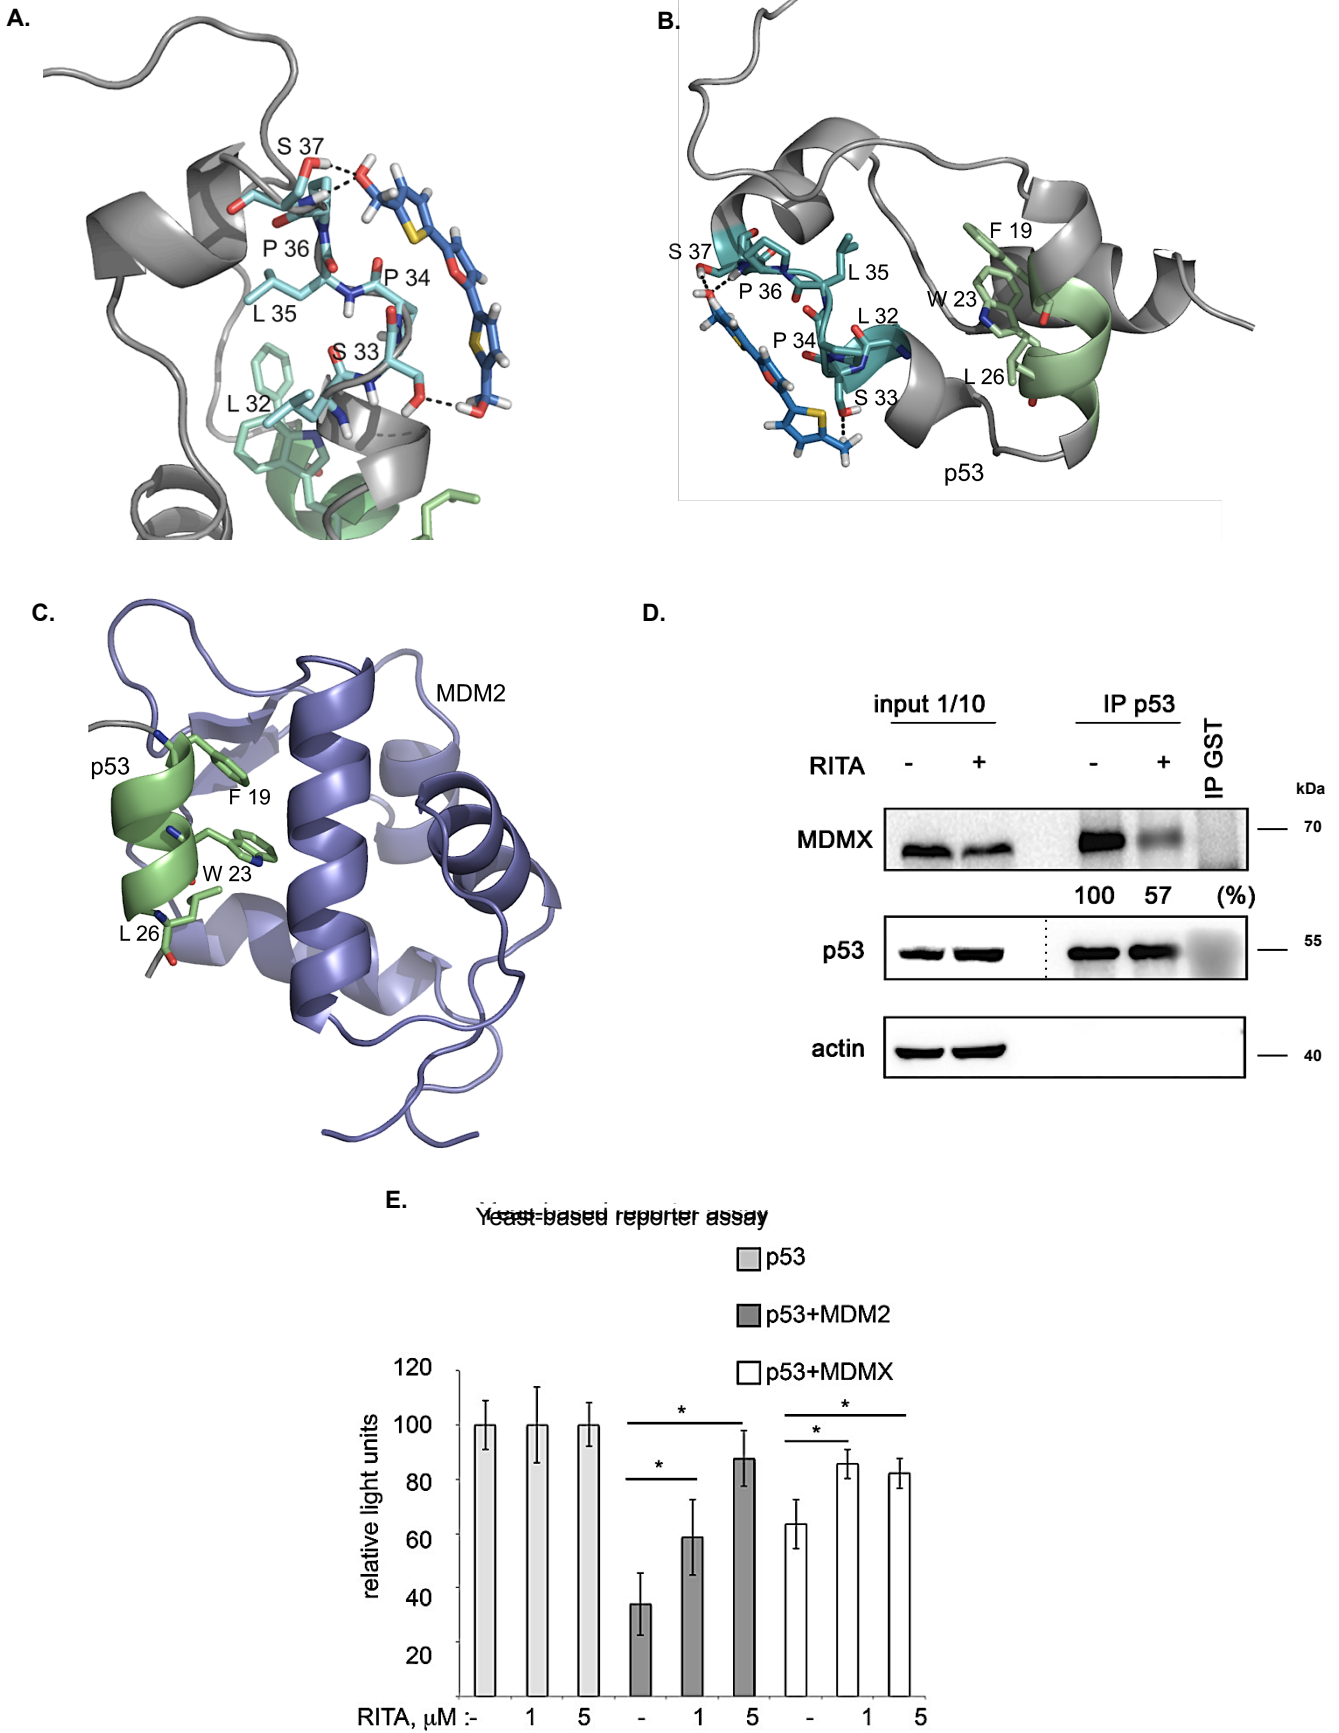

A.

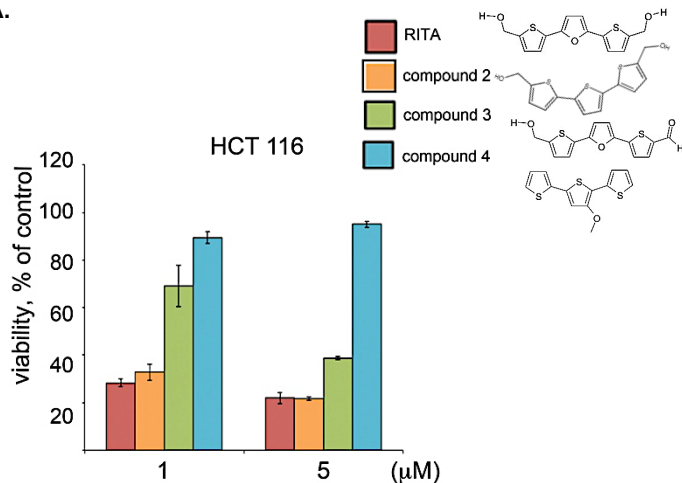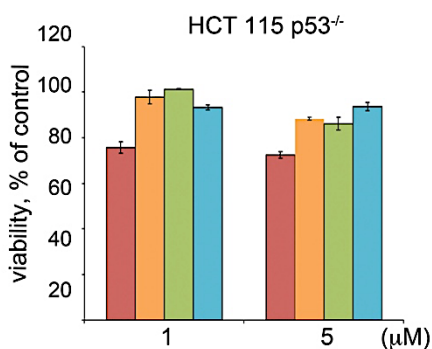

C.

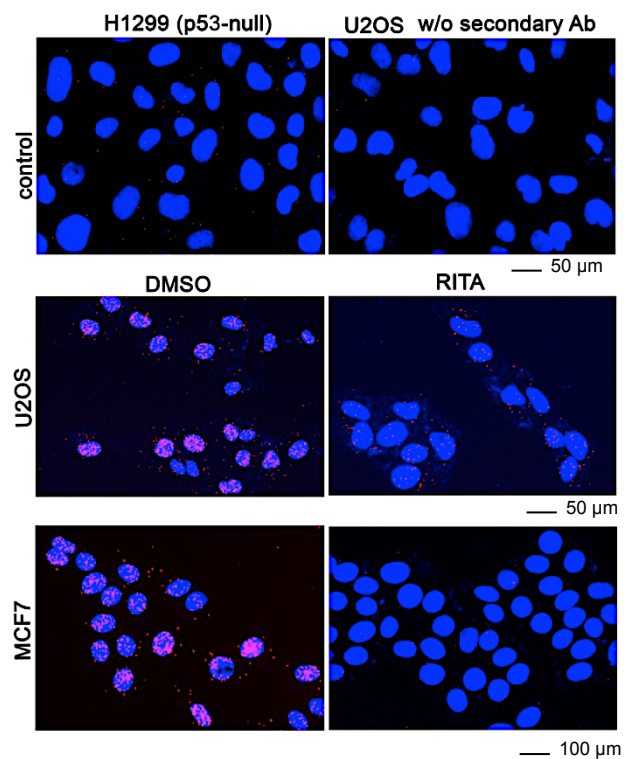

B.

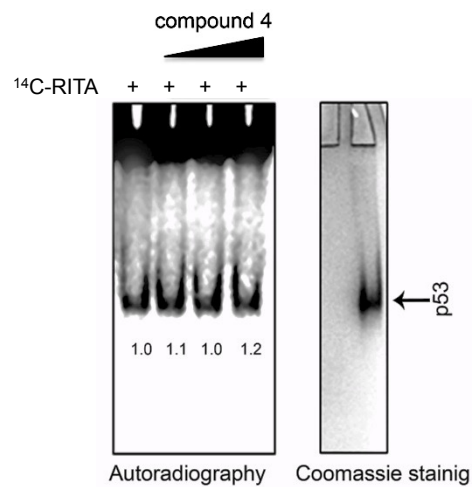

D.

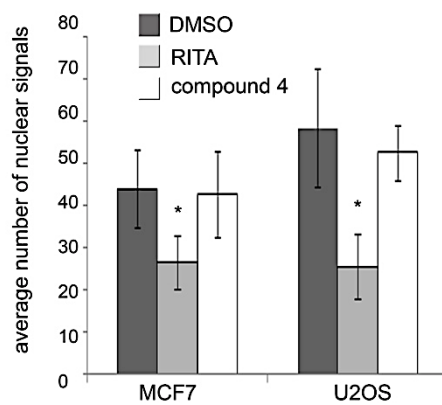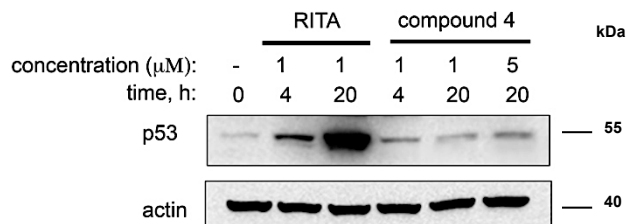

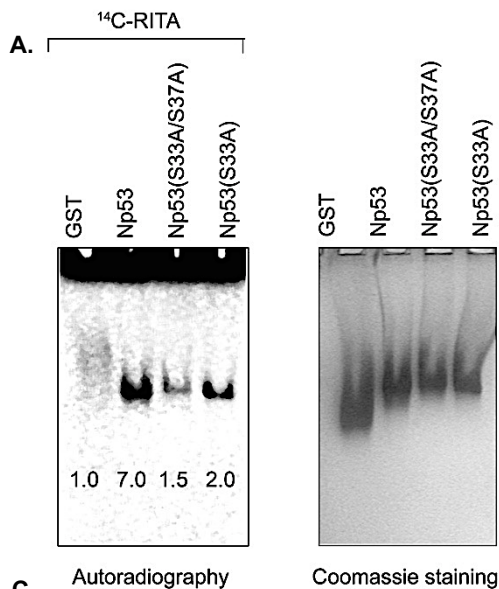

**C.** Autoradiography Coomassie staining

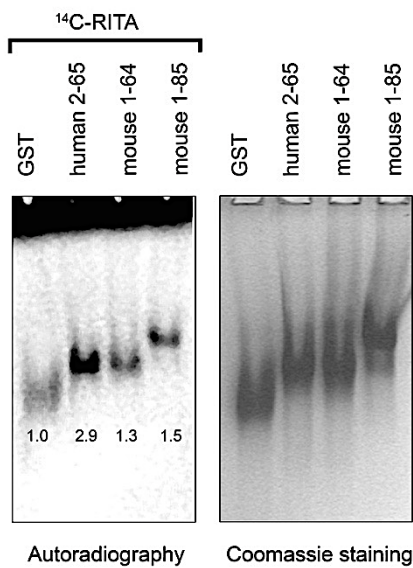

Autoradiography Coomassie staining

**E.** TA3-Sth mouse cancer cells

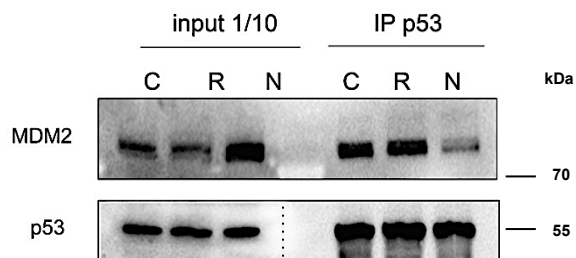

**G.**

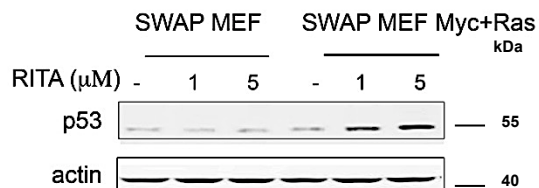

**B.**

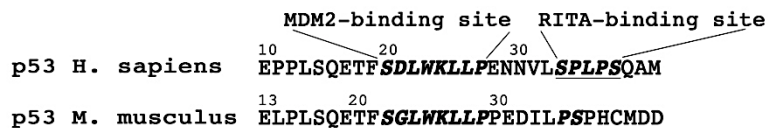

**D.**

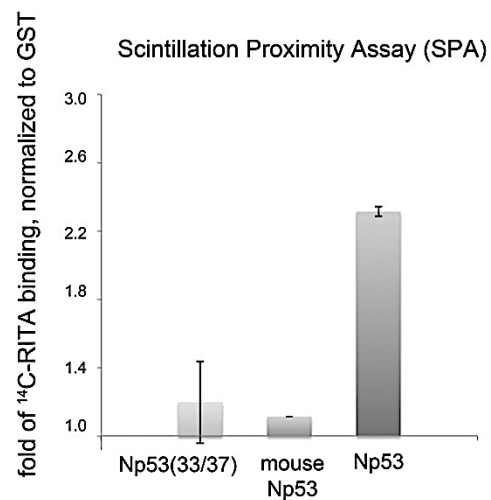

**F.**

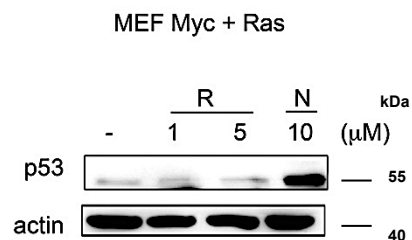



**A.** Yeast-based reporter assay **B.**

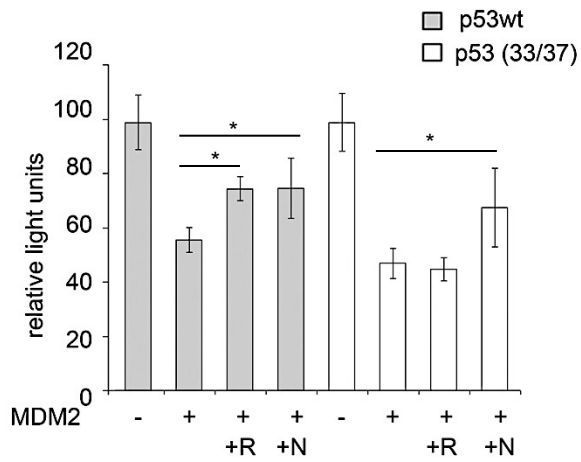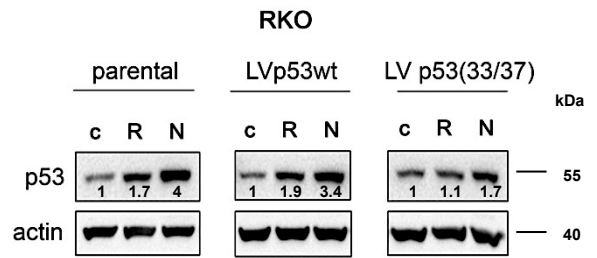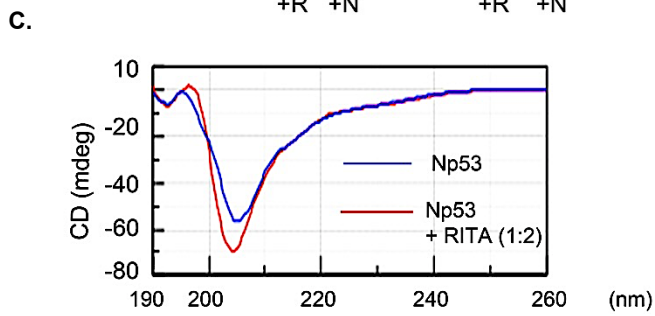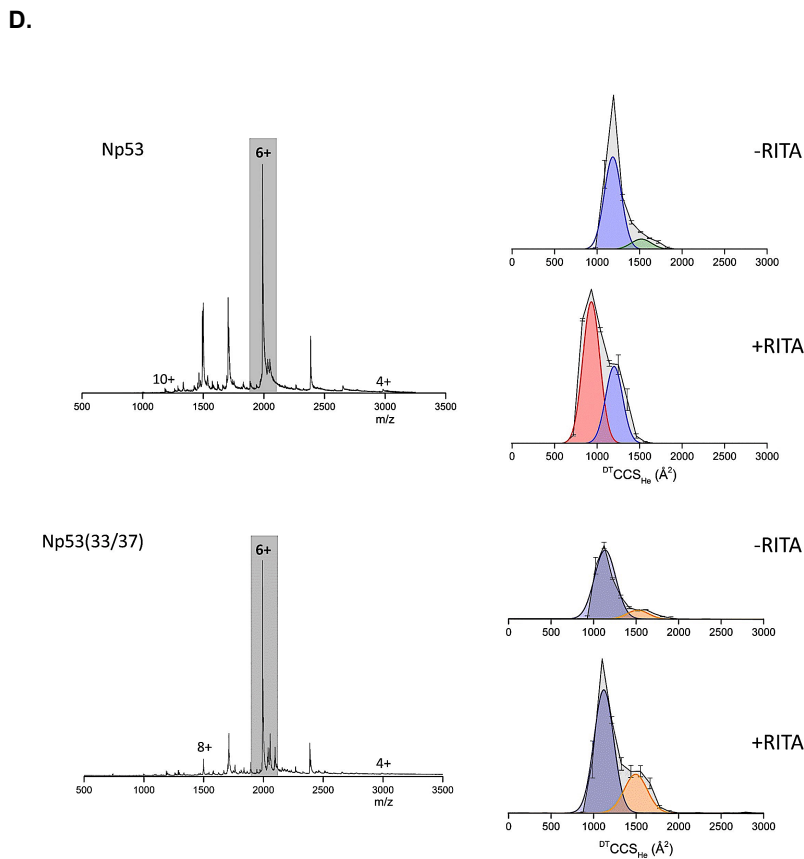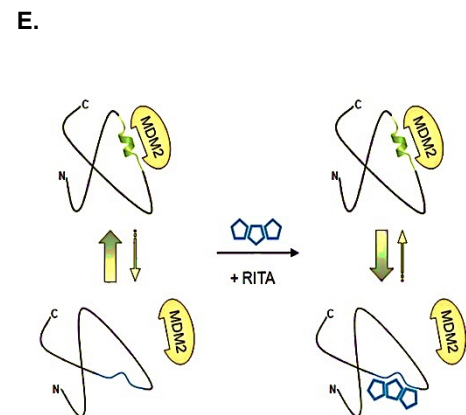

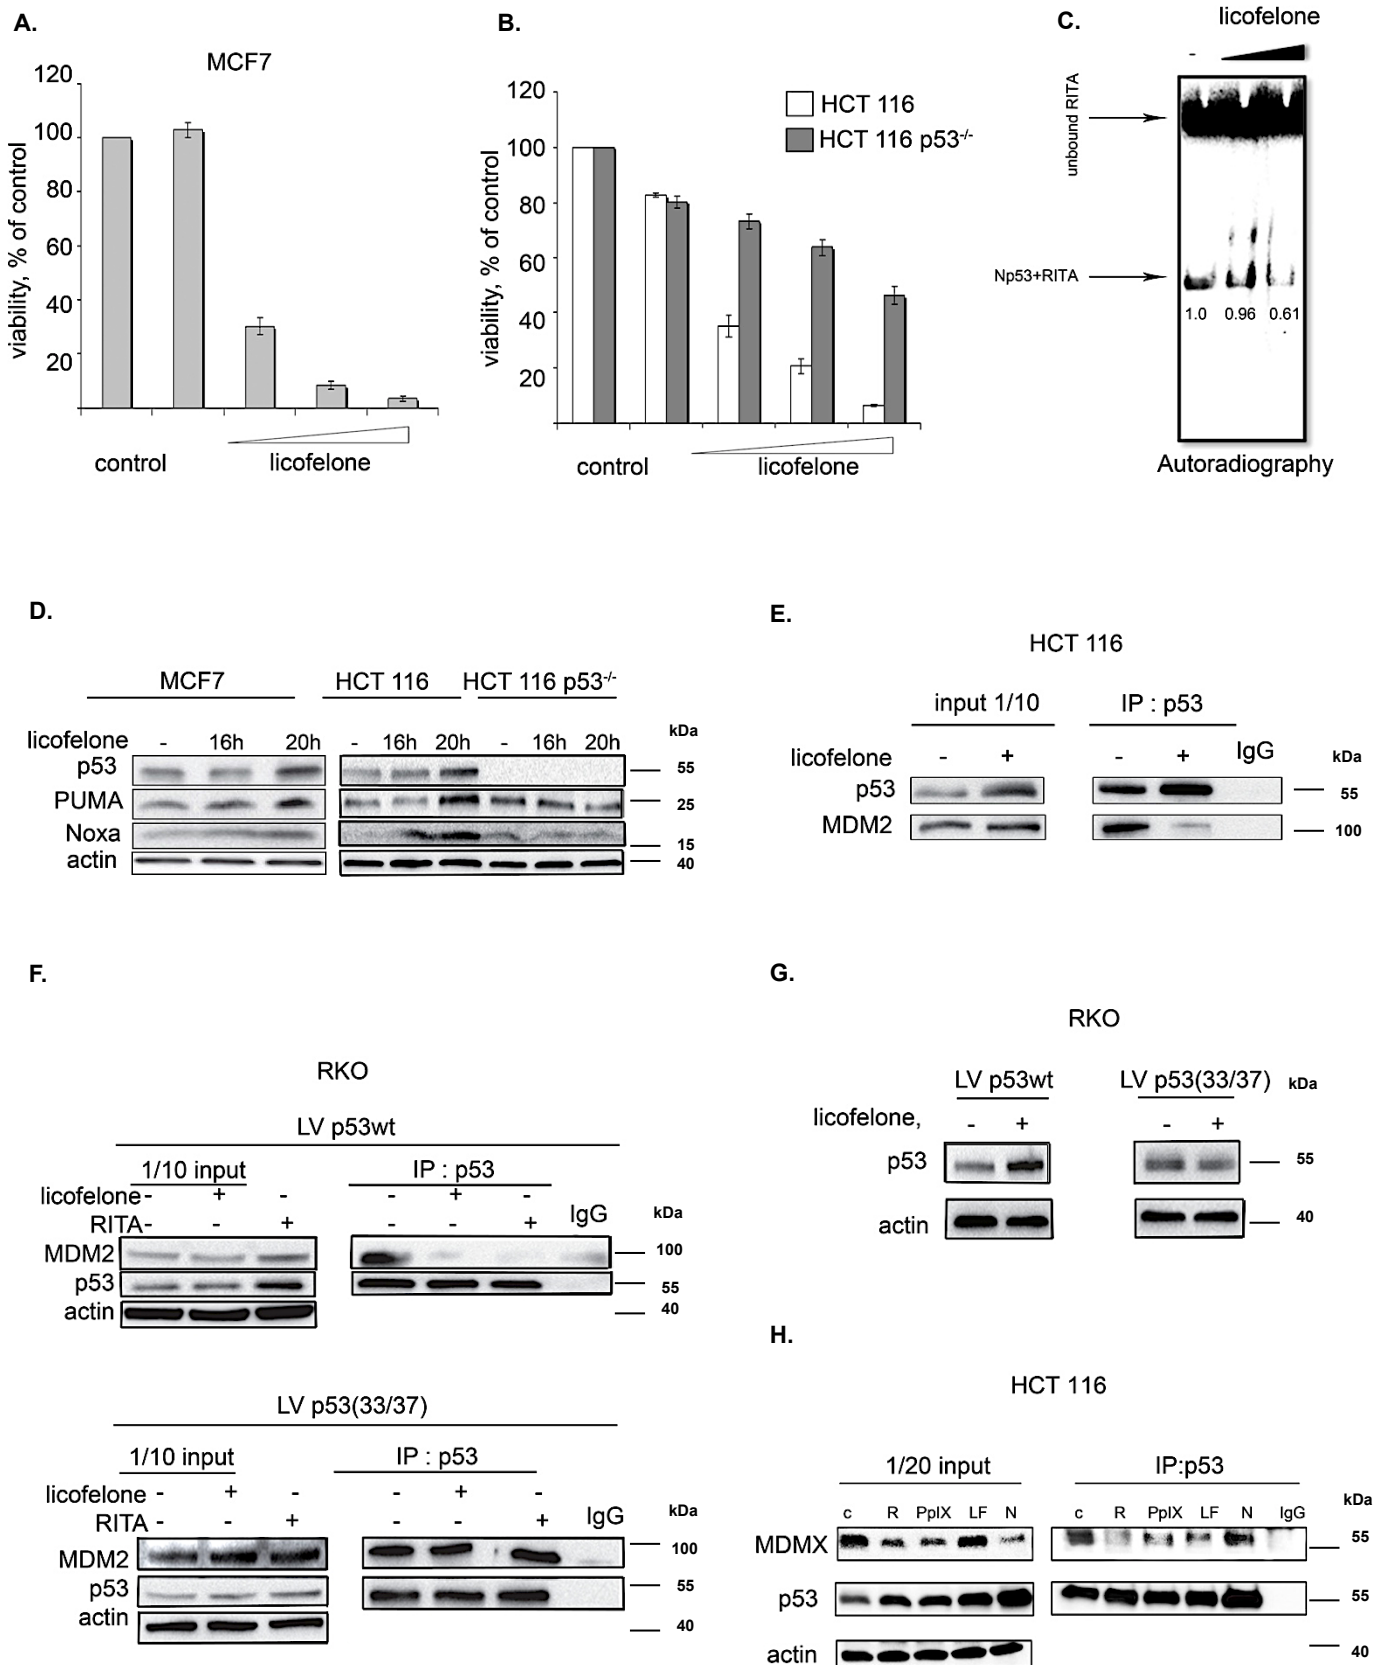

Source: https://www.biorxiv.org/content/10.1101/384248v4.full.pdf
