# Supplementary material for: Novel allosteric mechanism of p53 activation by small molecules for targeted anticancer therapy
Source: bioRxiv or medRxiv preprint supplement (doi:10.1101/384248), 2018-12-07
Supplement: Supplementary file [file media-2.pdf]

A.

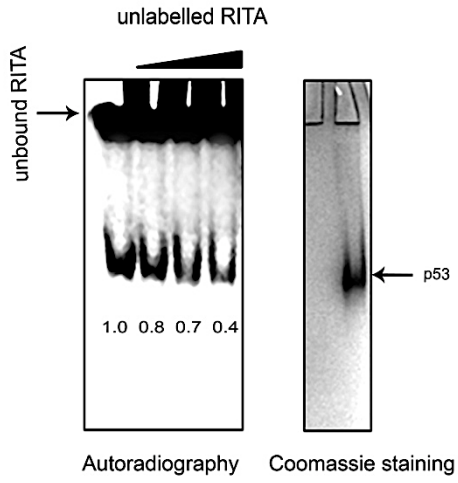

B.

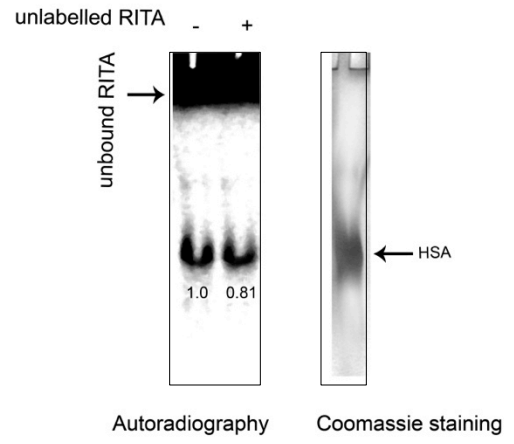

A.

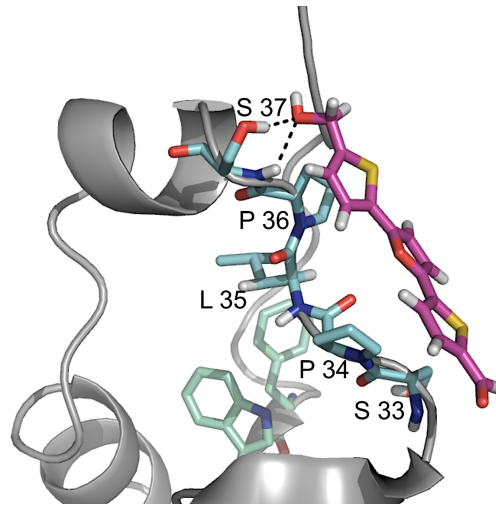

B.

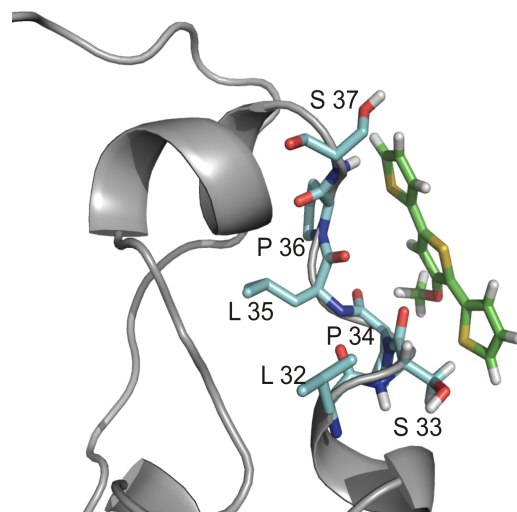

beta-gal p53 reporter assay

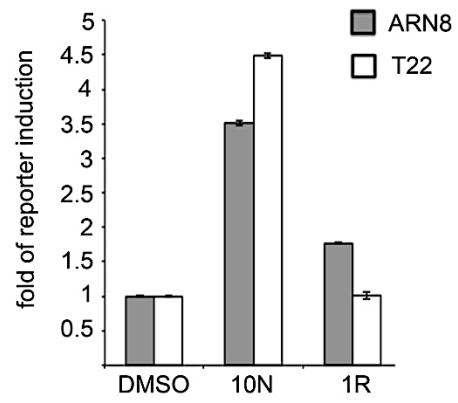

A.

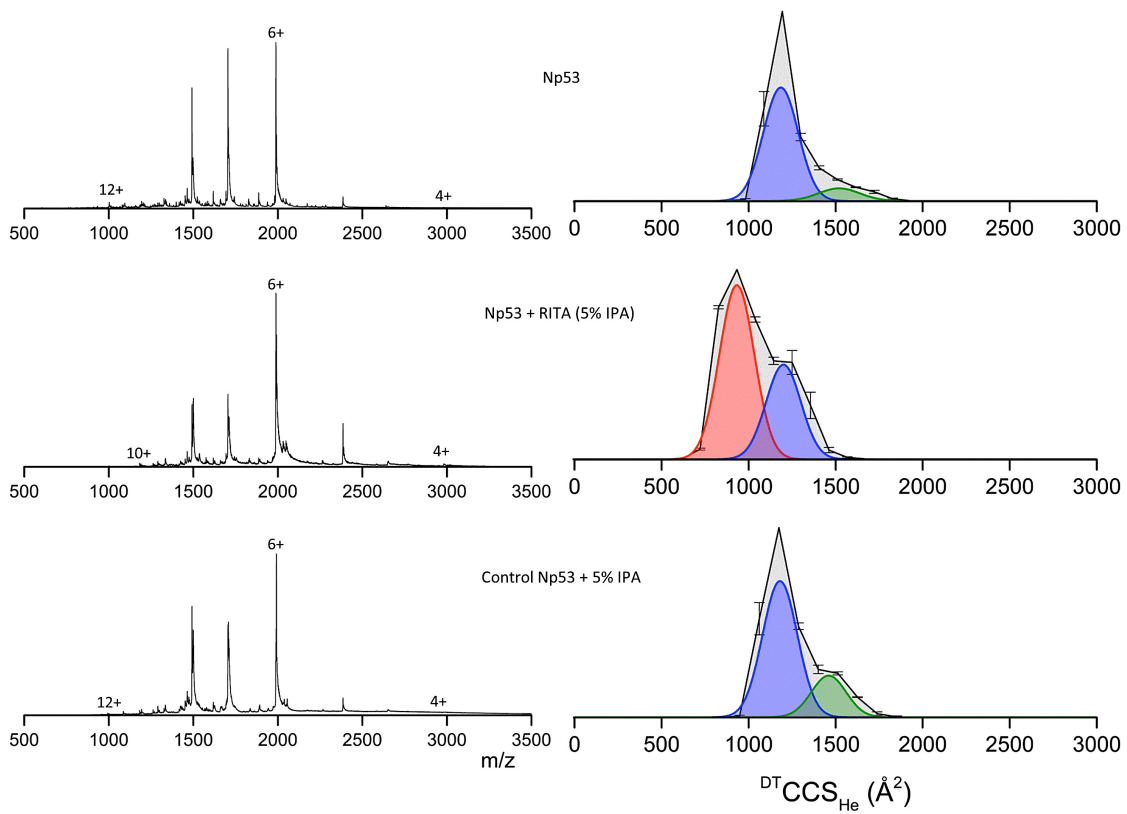

B.

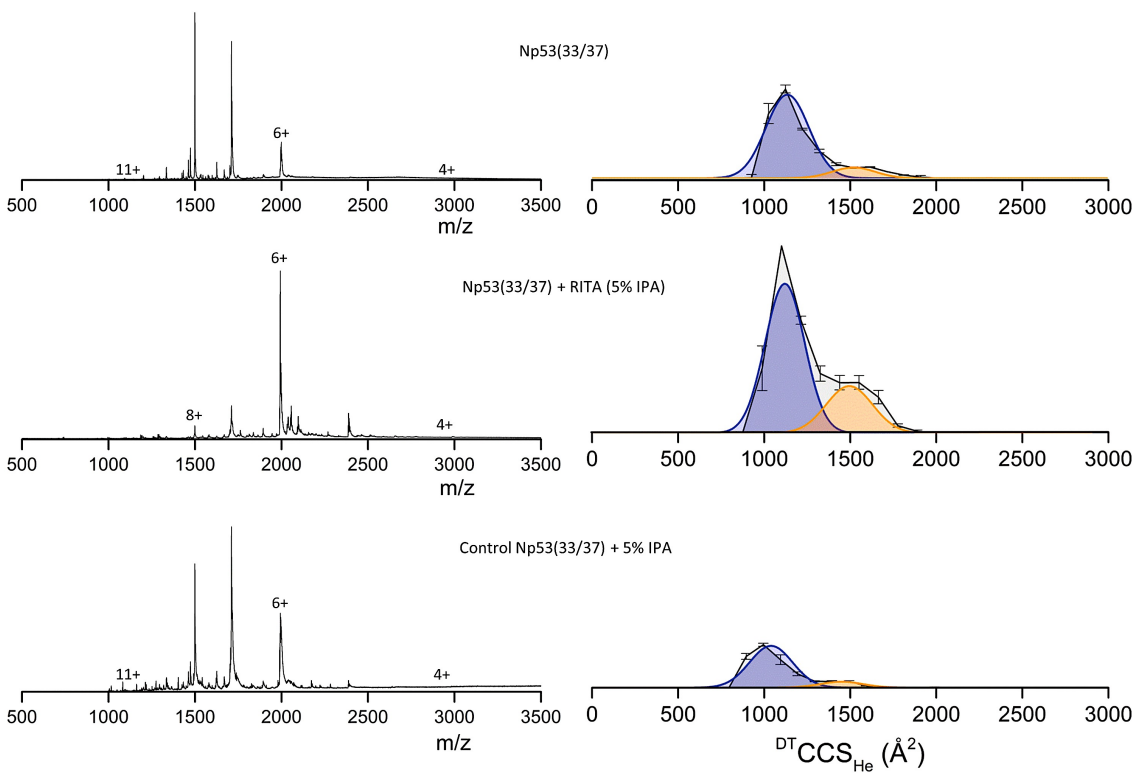

A.

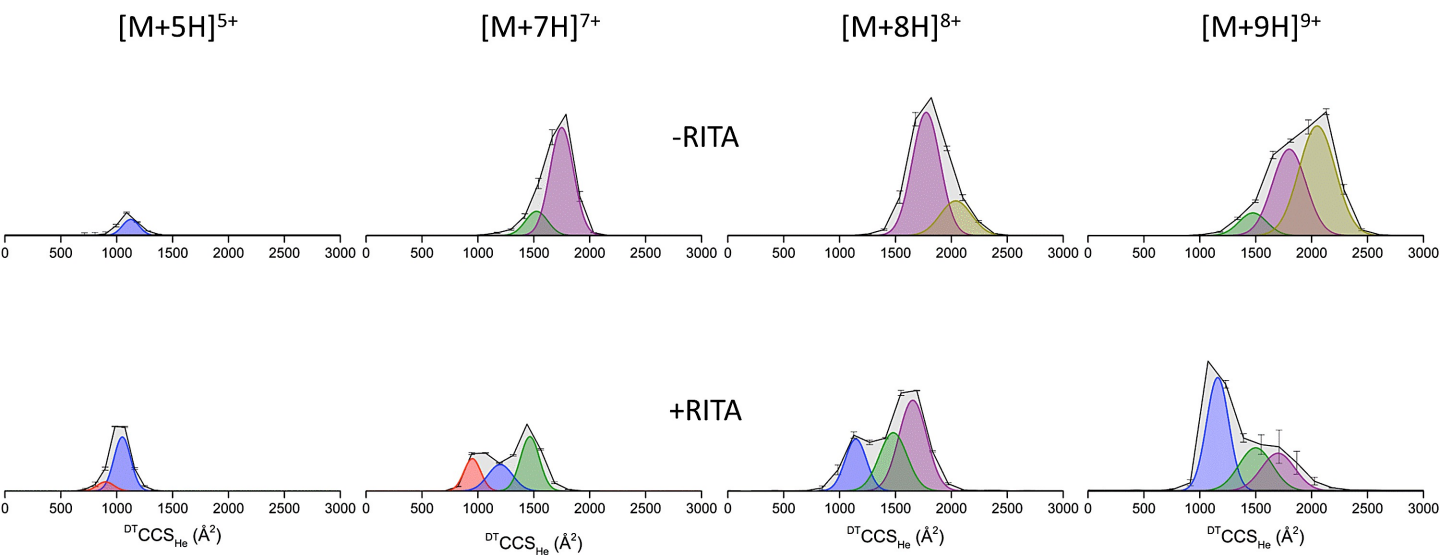

B.

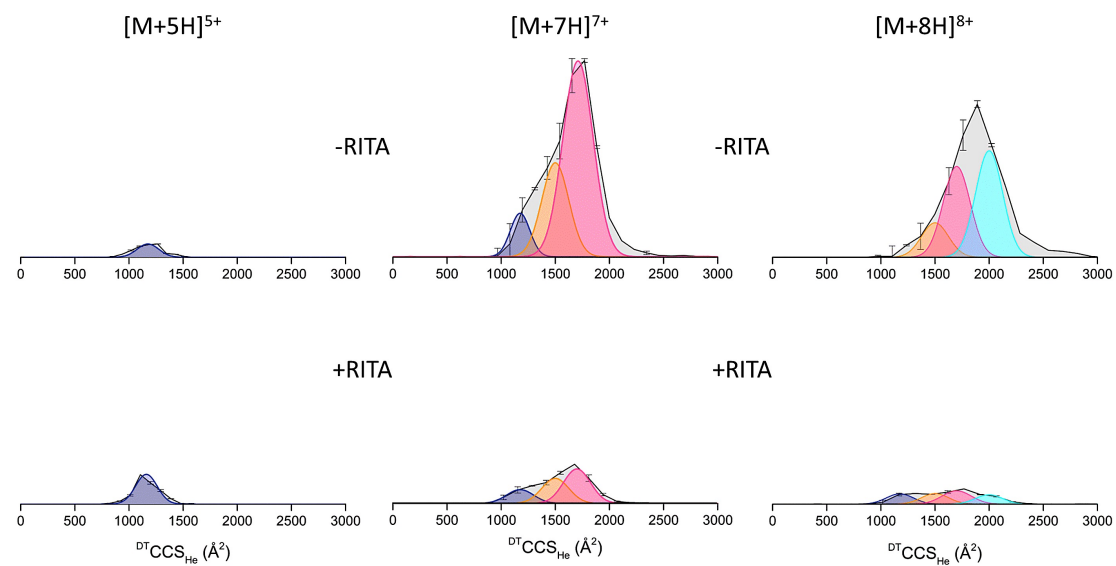

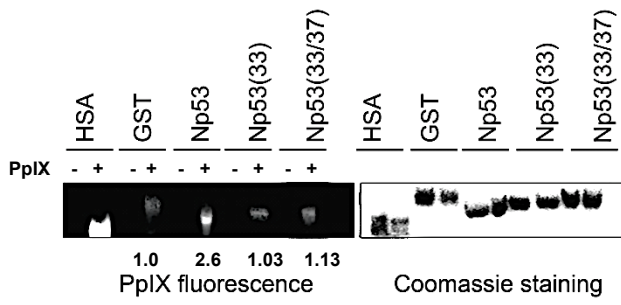

A.

F2H assay to assess p53/MDM2 interaction in cells

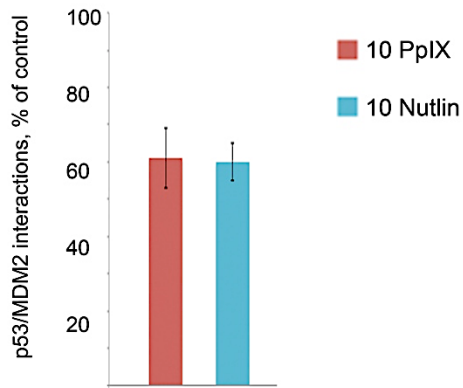

B.

Yeast-based reporter assay

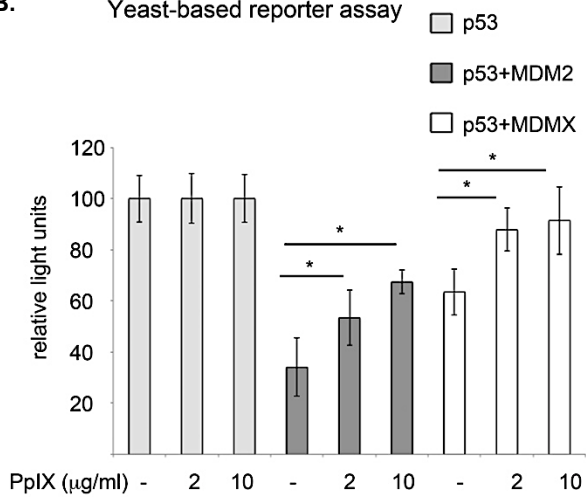

## Structural analogs of RITA and their biological activities

| Lp. | ID        | Structure                                                                           | Active/inactive          |
|-----|-----------|-------------------------------------------------------------------------------------|--------------------------|
| 1   | RITA      | 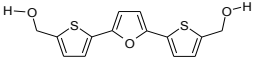   | Active (RITA)            |
| 2   | LCTA-2081 |    | Active                   |
| 3   | NSC672170 |    | Active (lower than RITA) |
| 4   | NSC650973 |    | Inactive                 |
| 5   | NSC629035 |    | Inactive                 |
| 6   | NSC613590 |    | Inactive                 |
| 7   | NSC691803 |    | Inactive                 |
| 8   | NSC647123 |   | Inactive                 |
| 9   | NSC657767 |  | Inactive                 |
| 10  | NSC661061 |  | Inactive                 |
| 11  | NSC694946 |  | Inactive                 |
| 12  | NSC116644 |  | Inactive                 |



## Functional analogs of RITA identified using cheminformatics

|   | DRUG ID   | DRUG NAME     | STRUCTURE                                                                           | TANIMOTO COEFFICIENT |
|---|-----------|---------------|-------------------------------------------------------------------------------------|----------------------|
| 1 | DCL000302 | LICOFELONE    | 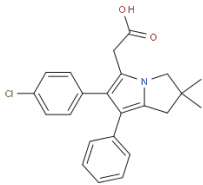   | 0.730445             |
| 2 | DCL000651 | TAK-442       |    | 0.718800             |
| 3 | DCL000306 | BENZBROMARONE |    | 0.655255             |
| 4 | DCL000444 | AVE0010       |  | 0.654472             |
| 5 | DAP000792 | RALOXIFENE    |  | 0.653526             |
| 6 | DAP000115 | ADAPALENE     |  | 0.652967             |
| 7 | DAP000089 | PROPRANOLOL   |  | 0.596243             |

|    | DRUG ID   | DRUG NAME   | STRUCTURE                                                                           | TANIMOTO COEFFICIENT |
|----|-----------|-------------|-------------------------------------------------------------------------------------|----------------------|
| 8  | DCL000615 | R7204       | 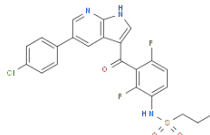   | 0.589953             |
| 9  | DAP000554 | FLUVASTATIN |    | 0.588334             |
| 10 | DCL000100 | DAP-81      |    | 0.580234             |
| 11 | DAP000968 | NAPROXEN    |   | 0.580234             |
| 12 | DCL000835 | HCV-796     |  | 0.554923             |
| 13 | DAP000735 | NABUMETONE  |  | 0.545487             |
